# Supplementary material for: Anti-Cancer Effect of Sesquiterpene and Triterpenoids from Agarwood of Aquilaria sinensis
Source: MDPI journal article supplement (doi:10.3390/molecules27165350), 2022-08-22
Supplement: s1 [file s1]

# Supplementary Materials

## Anti-Cancer Effect of Sesquiterpene and Triterpenoids from Agarwood of *Aquilaria sinensis*

Lili Chen <sup>1,†</sup>, Yunyun Liu <sup>2,†</sup>, Yifei Li <sup>2,†</sup>, Wu Yin <sup>1,\*</sup> and Yongxian Cheng <sup>2,\*</sup>

<sup>1</sup> State Key Lab of Pharmaceutical Biotechnology, College of Life Sciences, Nanjing University, Nanjing 210023, China

<sup>2</sup> Health Science Center, Institute for Inheritance-Based Innovation of Chinese Medicine, School of Pharmaceutical Sciences, Shenzhen University, Shenzhen 518060, China

\* Correspondence: wyin@nju.edu.cn (W.Y.); yxcheng@szu.edu.cn (Y.C.);  
Tel.: +86-0755-2690-2073 (Y.C.)

† These authors contributed equally to this work.

## Table of Contents

1. Figures S1–S8 NMR spectra and HRESIMS of 1
2. Figures S9–S15 NMR spectra and HRESIMS of 2
3. Figures S16–S22 NMR spectra and HRESIMS of 3
4. Figures S23–S29 NMR spectra and HRESIMS of 4
5. Figures S30–S36 NMR spectra and HRESIMS of 5
6. Table S1 Crystal data and structure refinement for 1.
7. Table S2 Fractional Atomic Coordinates ( $\times 10^4$ ) and Equivalent Isotropic Displacement Parameters ( $\text{\AA}^2 \times 10^3$ ) for 1.  $U_{eq}$  is defined as 1/3 of the trace of the orthogonalised  $U_{IJ}$  tensor.
8. Table S3 Anisotropic Displacement Parameters ( $\text{\AA}^2 \times 10^3$ ) for 1. The Anisotropic displacement factor exponent takes the form:  $-2\pi^2[h^2a^{*2}U_{11}+2hka^*b^*U_{12}+\dots]$ .
9. Table S4 Bond Lengths for 1.
10. Table S5 Bond Angles for 1.
11. Table S6 Torsion Angles for 1.
12. Table S7 Hydrogen Atom Coordinates ( $\text{\AA} \times 10^4$ ) and Isotropic Displacement Parameters ( $\text{\AA}^2 \times 10^3$ ) for 1.
13. Figure S37. Effects of Compound 1-10 and DDP on cell viability in human cancer cells.
14. Figure S38. Compound 3 promoted the production of reactive oxygen species in human breast cancer cells.
15. Figure S39. The lowest energy conformers of 1
16. Figure S40. The lowest energy conformers of 2
17. Figure S41. The lowest energy conformers of 3
18. Figure S42. The lowest energy conformers of 4
19. Figure S43. The lowest energy conformers of 5
20. Table S8. Extracted heats and weighting factors of the optimized conformers of 2–5 at B3LYP/6-311g(d,p) level
21. Table S9. The Cartesian coordinates of the lowest energy conformers for 2–5

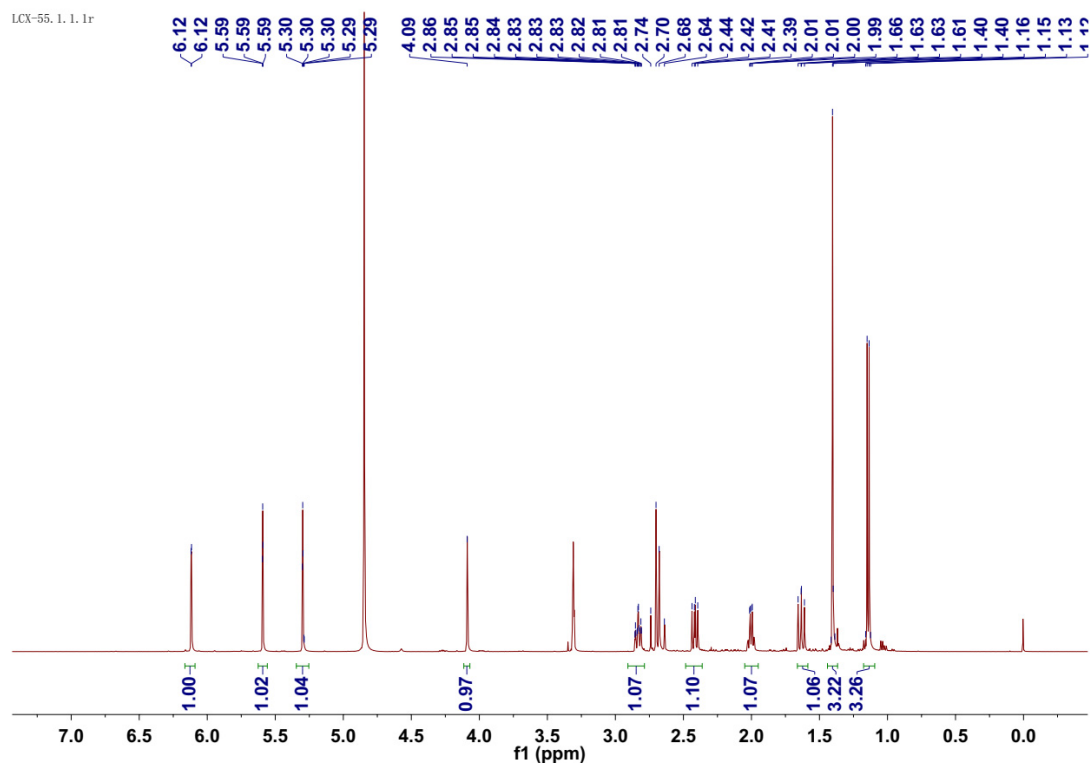

Figure S1.  $^1\text{H}$  NMR spectrum of **1** in Methanol- $d_4$ .

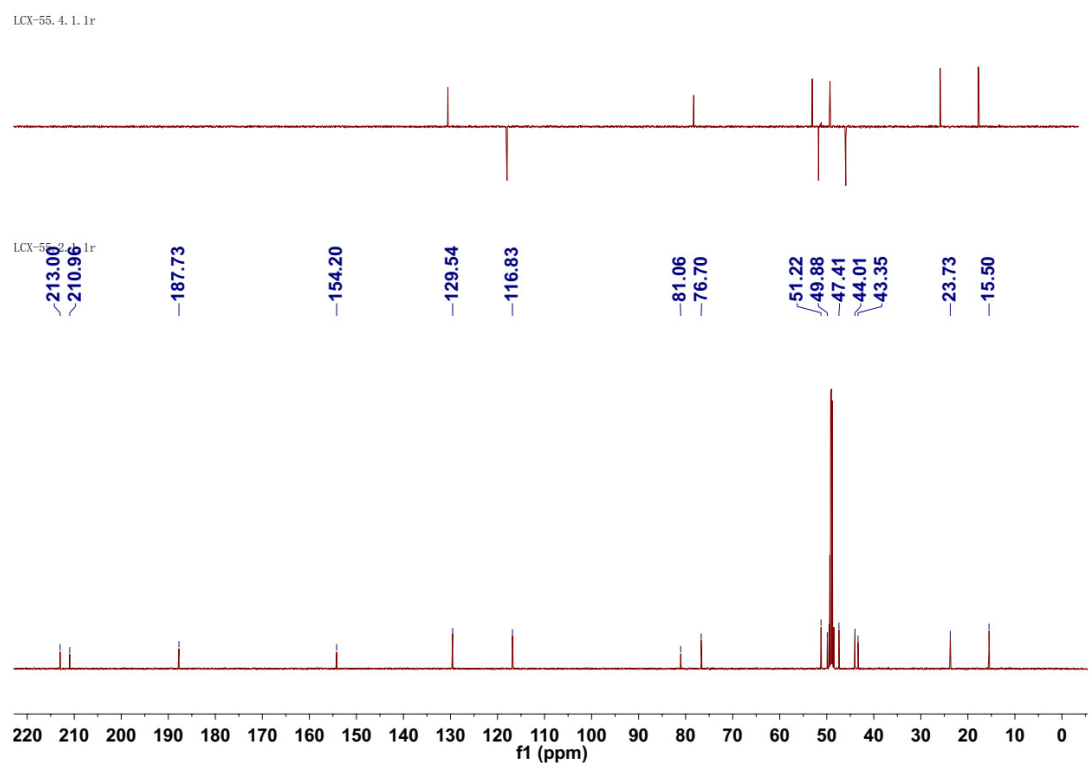

Figure S2.  $^{13}\text{C}$  NMR and DEPT spectra of **1** in Methanol- $d_4$ .

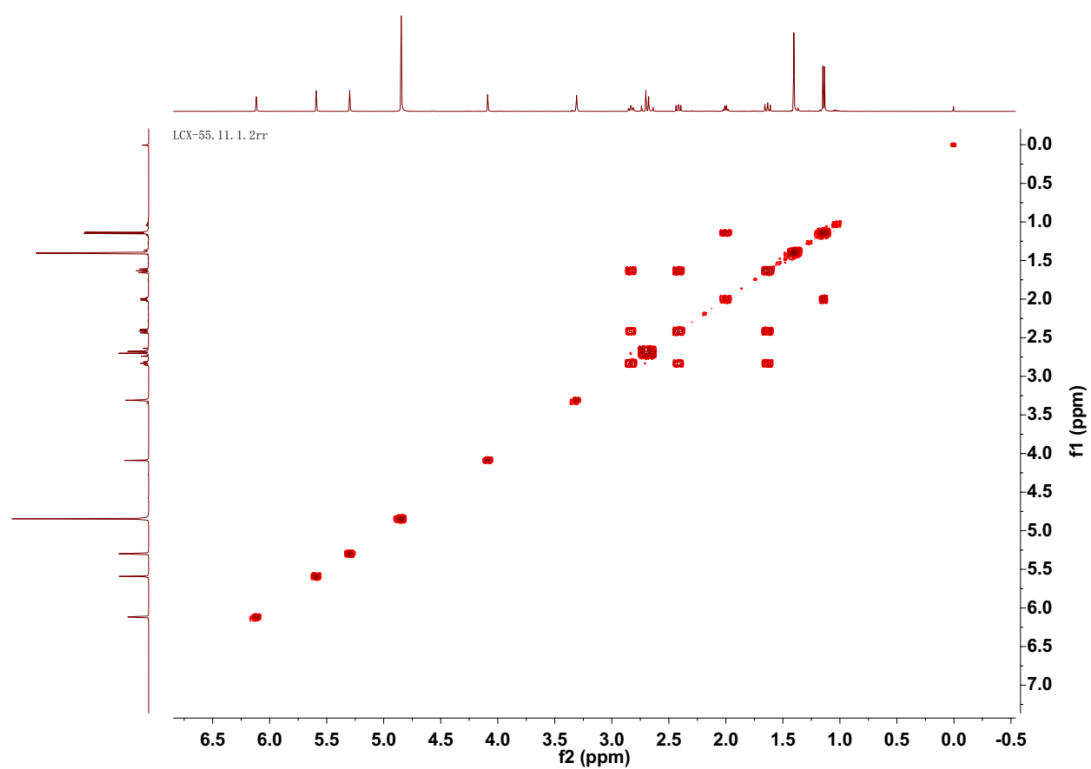

**Figure S3.**  $^1\text{H}$ - $^1\text{H}$  COSY spectrum of **1** in Methanol- $d_4$ .

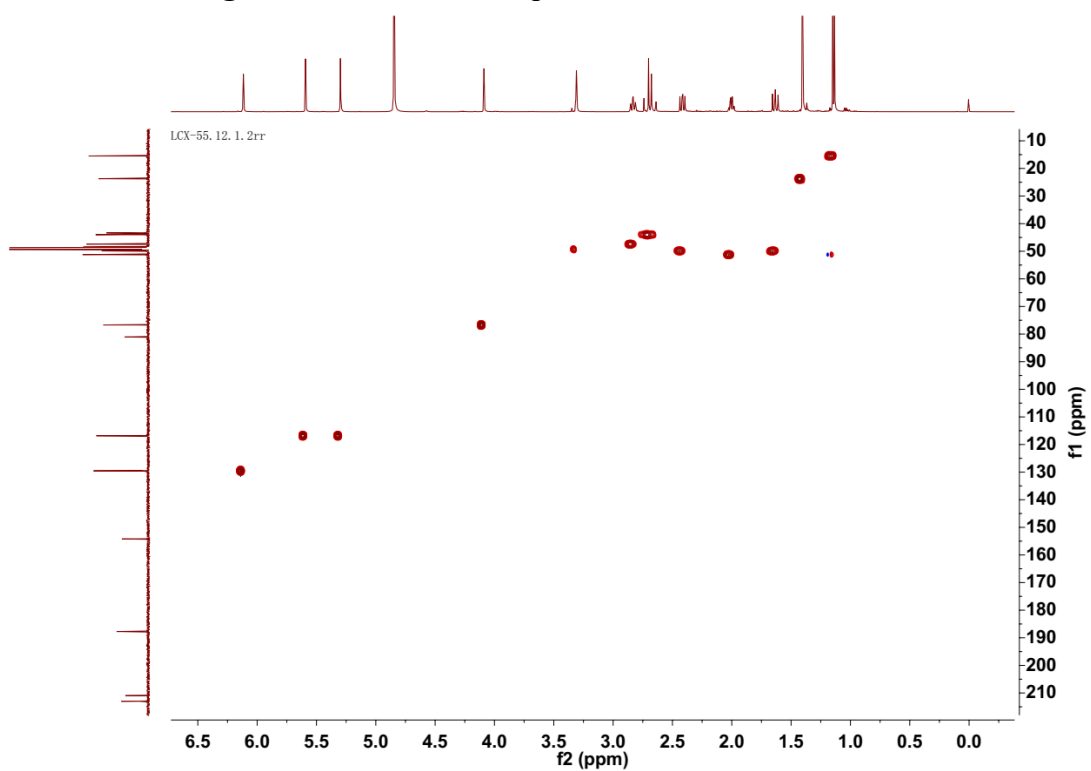

**Figure S4.** HSQC spectrum of **1** in Methanol- $d_4$ .

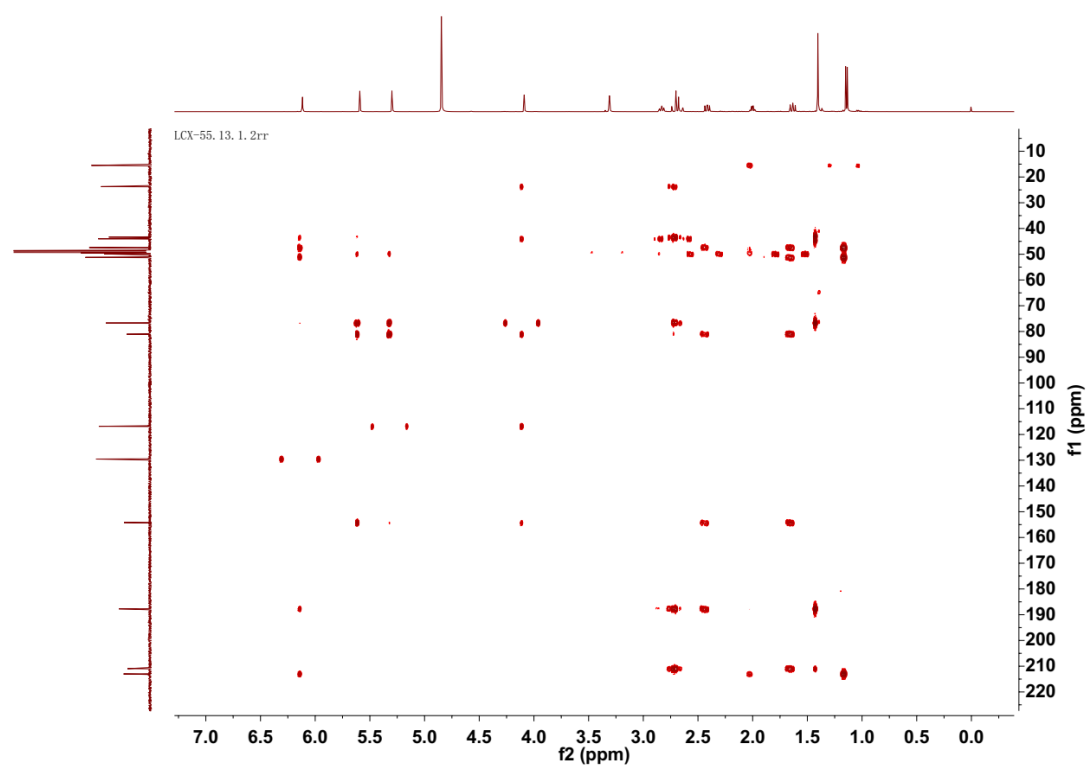

**Figure S5.** HMBC spectrum of **1** in Methanol- $d_4$ .

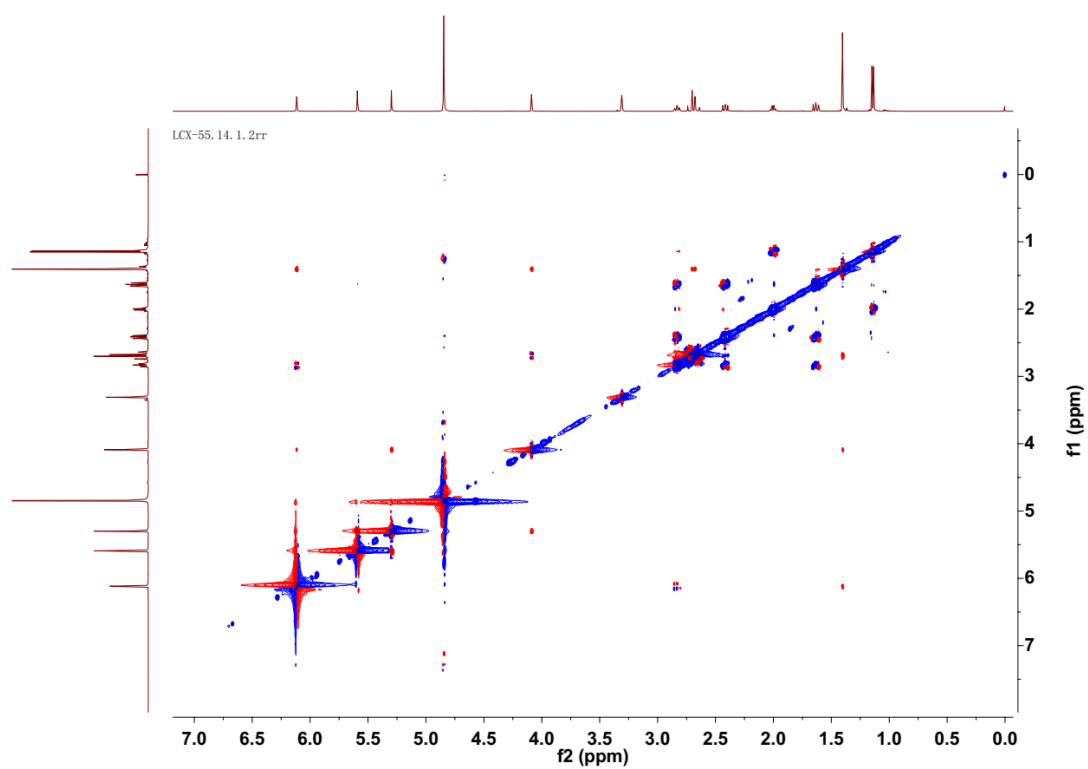

**Figure S6.** ROESY spectrum of **1** in Methanol- $d_4$ .

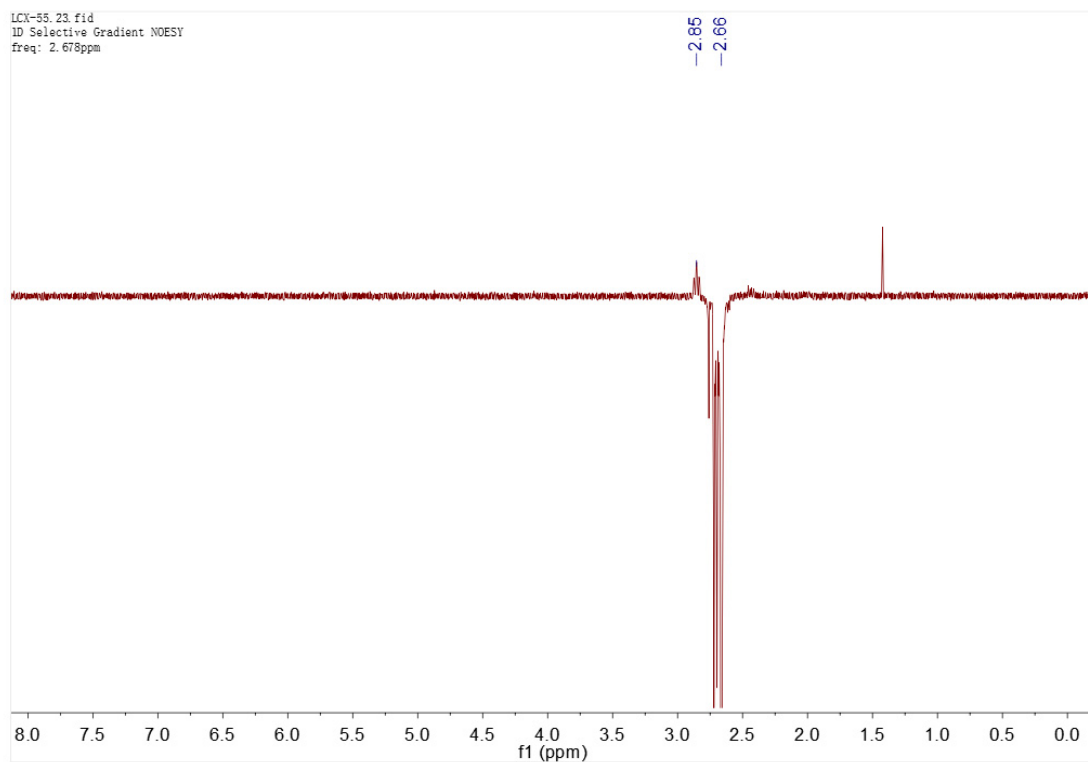

**Figure S7.** NOE spectrum of **1** in Methanol- $d_4$ .

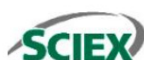

Created with SCIEX OS 1.4.1  
Printed:18/1/2021 4:17:50 PM

|                    |                       |                 |           |
|--------------------|-----------------------|-----------------|-----------|
| Acquisition Date   | 18/1/2021 12:01:05 PM | Result Table    | LCX-55    |
| Acquisition Method | N/A                   | Algorithm Used  | AutoPeak  |
| Project            | N/A                   | Instrument Name | X500 QTOF |

#### Mass Spectra

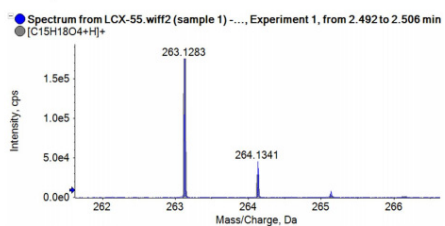

| # | Analyte Peak Name | Formula                                        | Precursor Mass | Found At Mass | Mass Error (ppm) |
|---|-------------------|------------------------------------------------|----------------|---------------|------------------|
| 1 | LCX-55            | C <sub>15</sub> H <sub>18</sub> O <sub>4</sub> | 263.1280       | 263.1283      | 2.1              |

**Figure S8.** HRESIMS of **1**.

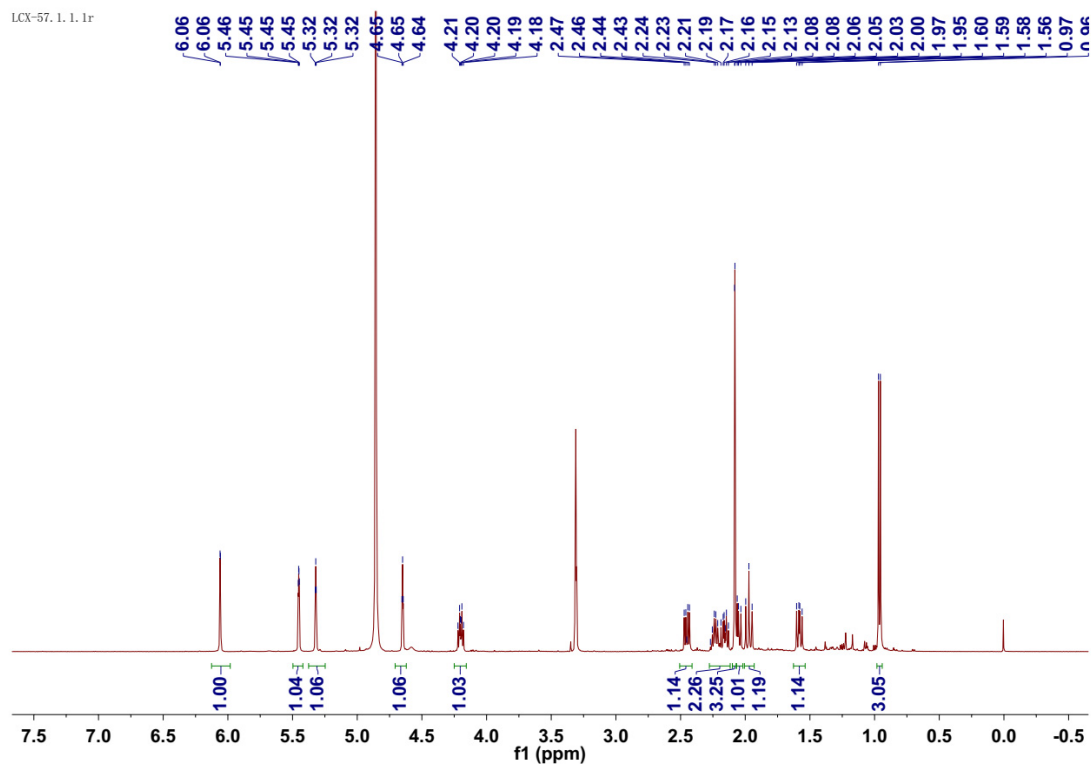

Figure S9.  $^1\text{H}$  NMR spectrum of **2** in Methanol- $d_4$ .

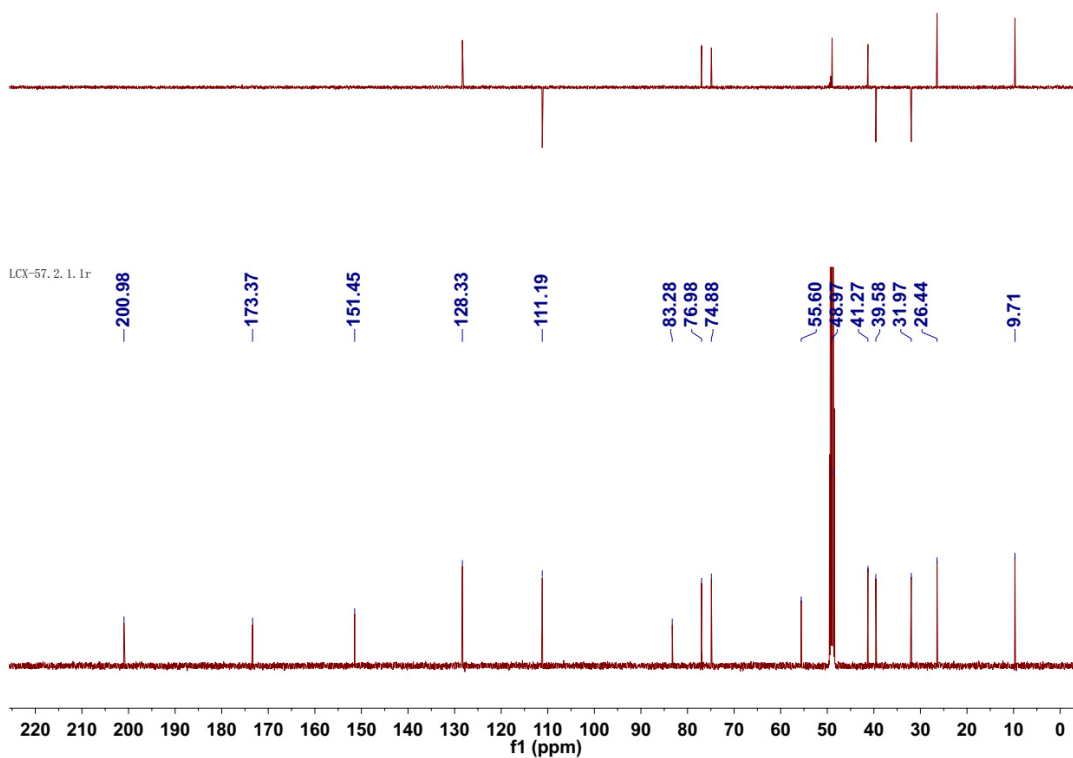

Figure S10.  $^{13}\text{C}$  NMR spectrum of **2** in Methanol- $d_4$ .

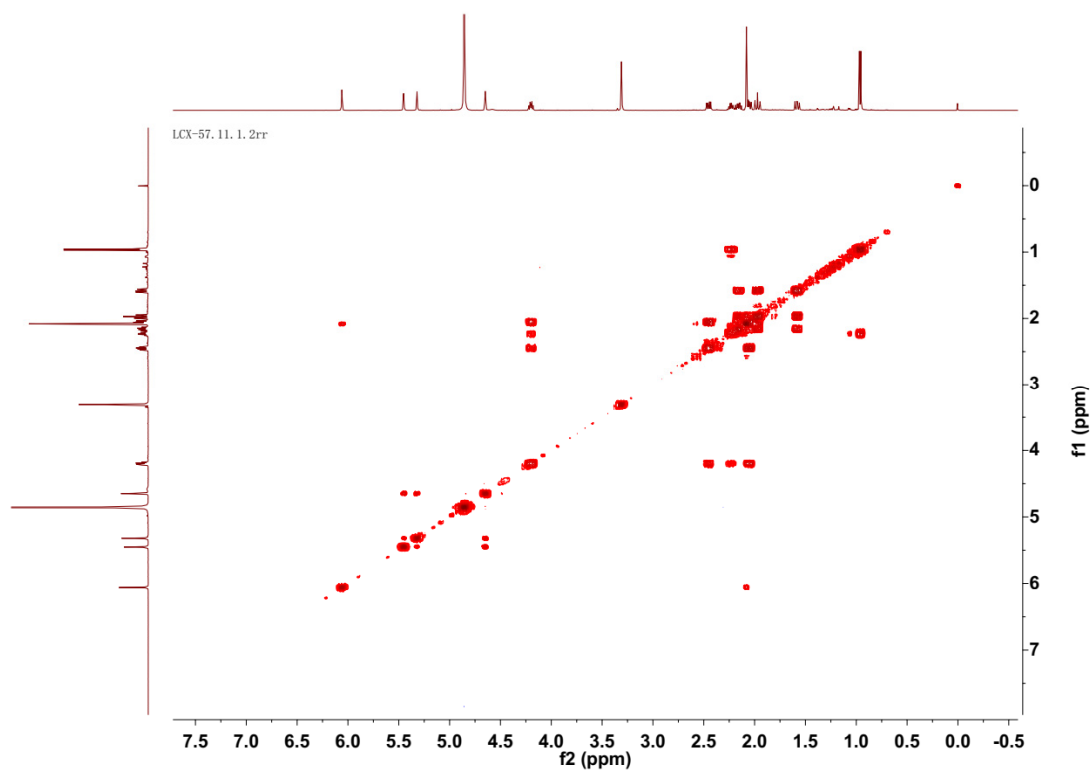

**Figure S11.**  $^1\text{H}$ - $^1\text{H}$  COSY spectrum of **2** in Methanol- $d_4$ .

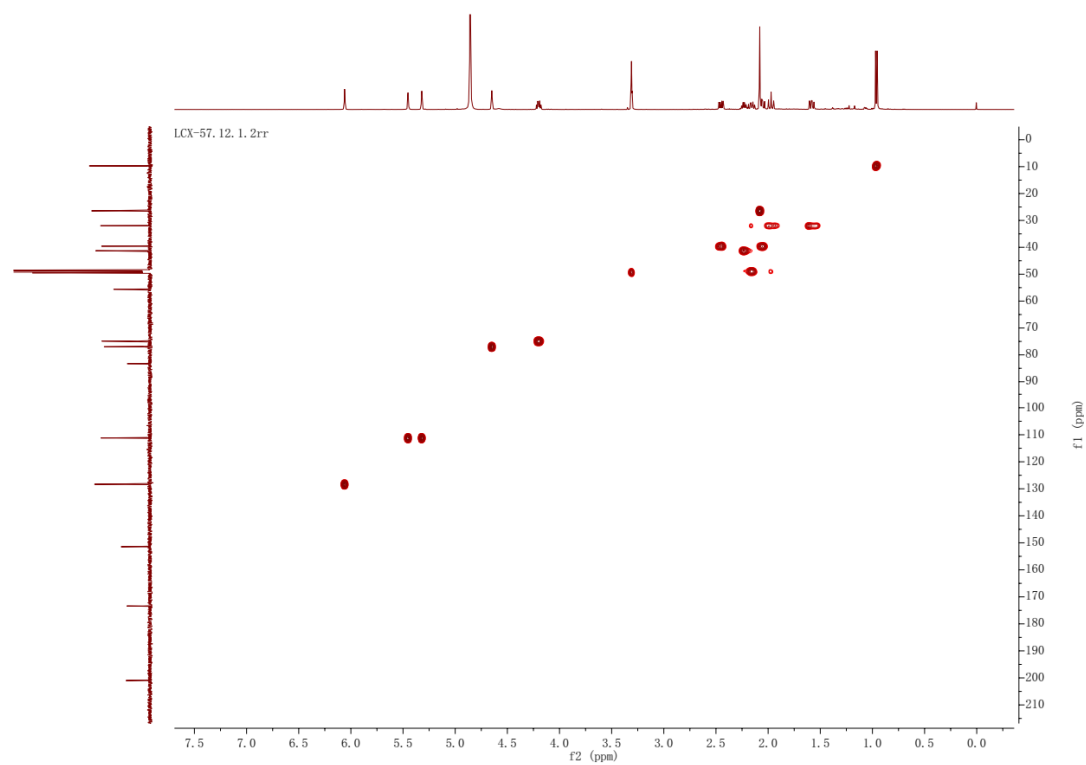

**Figure S12.** HSQC spectrum of **2** in Methanol- $d_4$ .



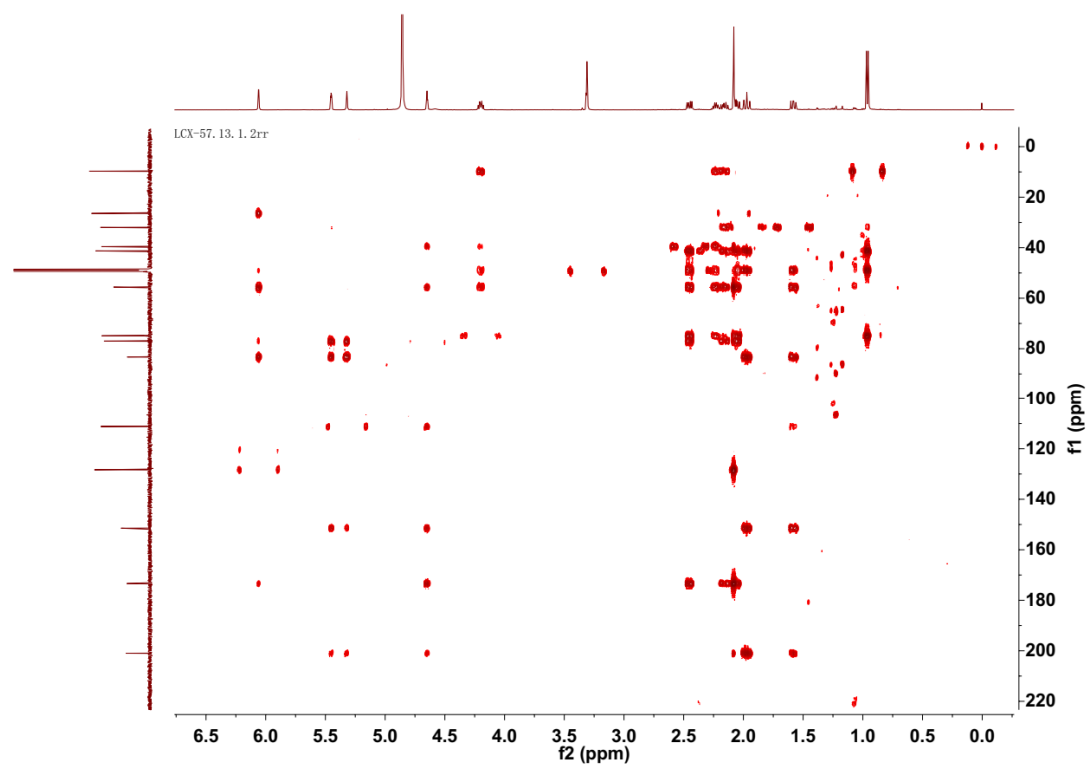

**Figure S13.** HMBC spectrum of **2** in Methanol-*d*<sub>4</sub>.

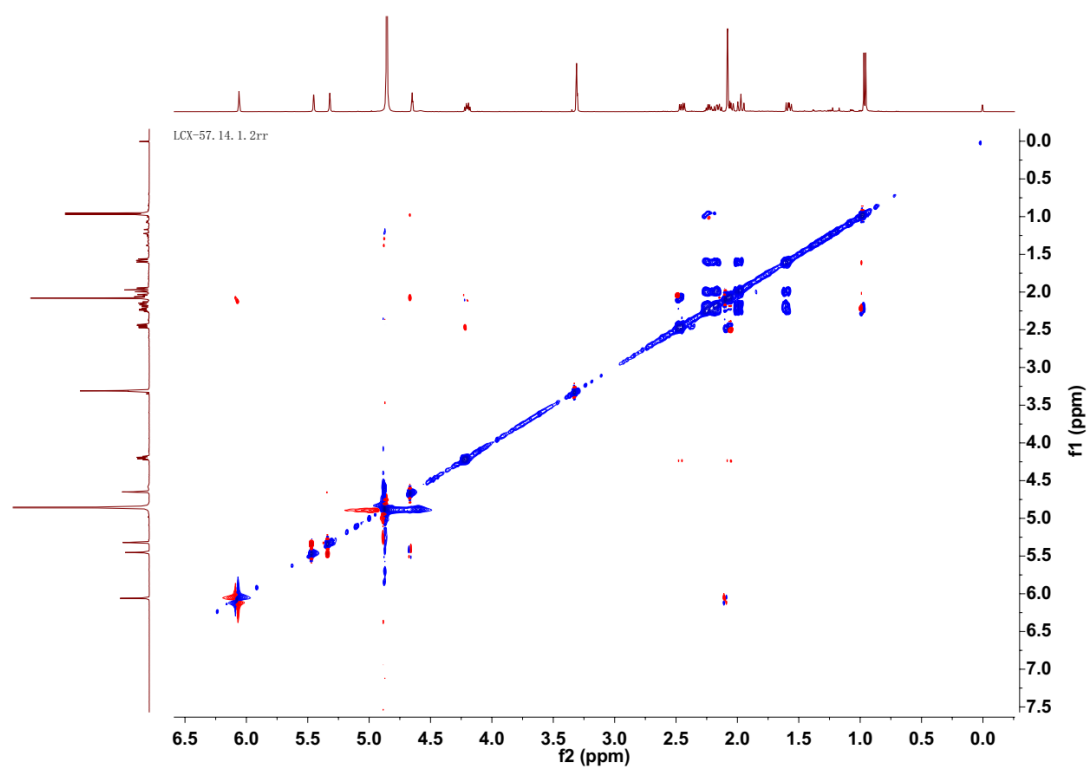

**Figure S14.** ROESY spectrum of **2** in Methanol-*d*<sub>4</sub>.

|                    |                       |                 |           |
|--------------------|-----------------------|-----------------|-----------|
| Acquisition Date   | 18/1/2021 12:11:37 PM | Result Table    | LCX-57    |
| Acquisition Method | N/A                   | Algorithm Used  | AutoPeak  |
| Project            | N/A                   | Instrument Name | X500 QTOF |

#### Mass Spectra

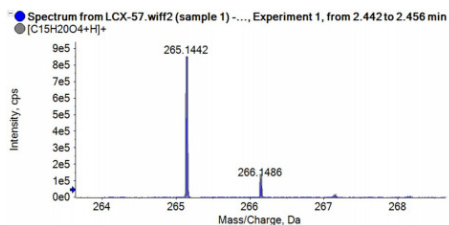

| # | Analyte Peak Name | Formula                                        | Precursor Mass | Found At Mass | Mass Error (ppm) |
|---|-------------------|------------------------------------------------|----------------|---------------|------------------|
| 1 | LCX-57            | C <sub>15</sub> H <sub>20</sub> O <sub>4</sub> | 265.1430       | 265.1442      | 2.9              |

Figure S15. HRESIMS of 2.

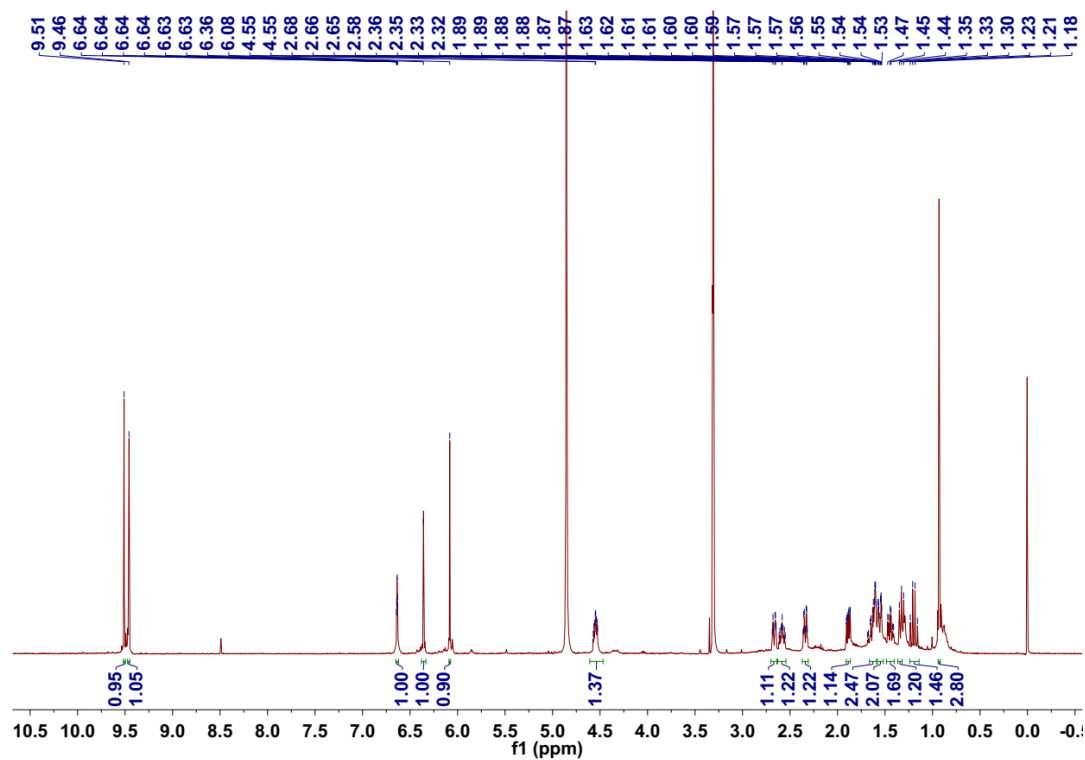

Figure S16. <sup>1</sup>H NMR spectrum of 3 in Methanol-*d*<sub>4</sub>.

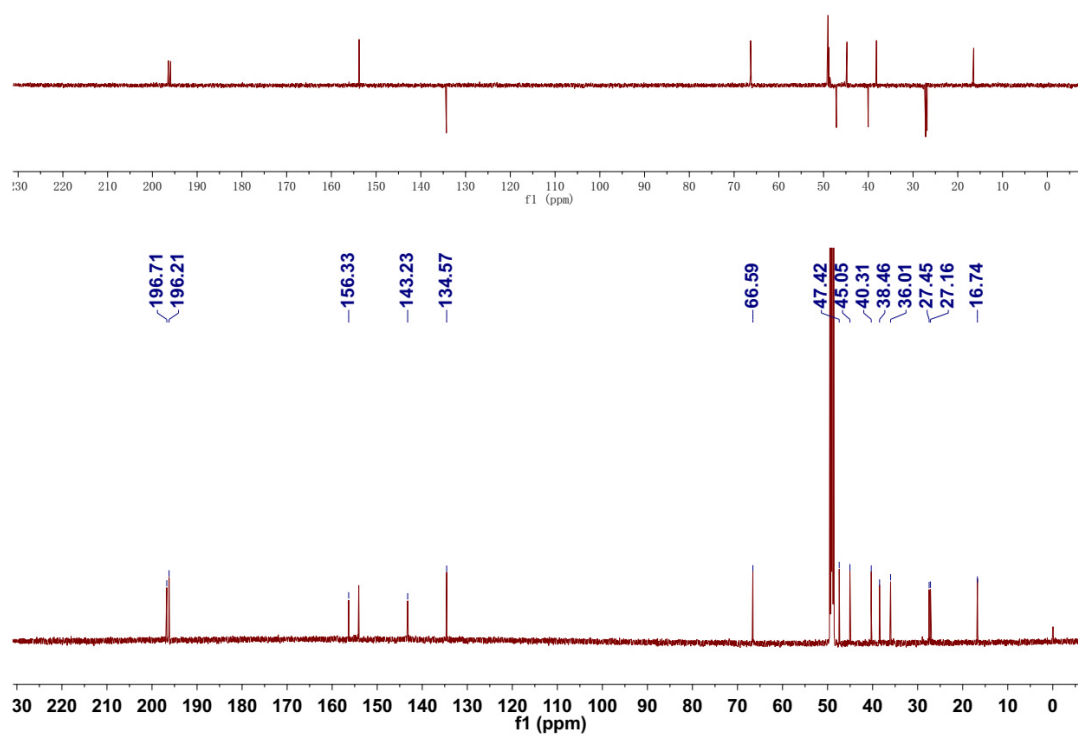

Figure S17.  $^{13}\text{C}$  NMR and DEPT spectra of **3** in Methanol- $d_4$ .

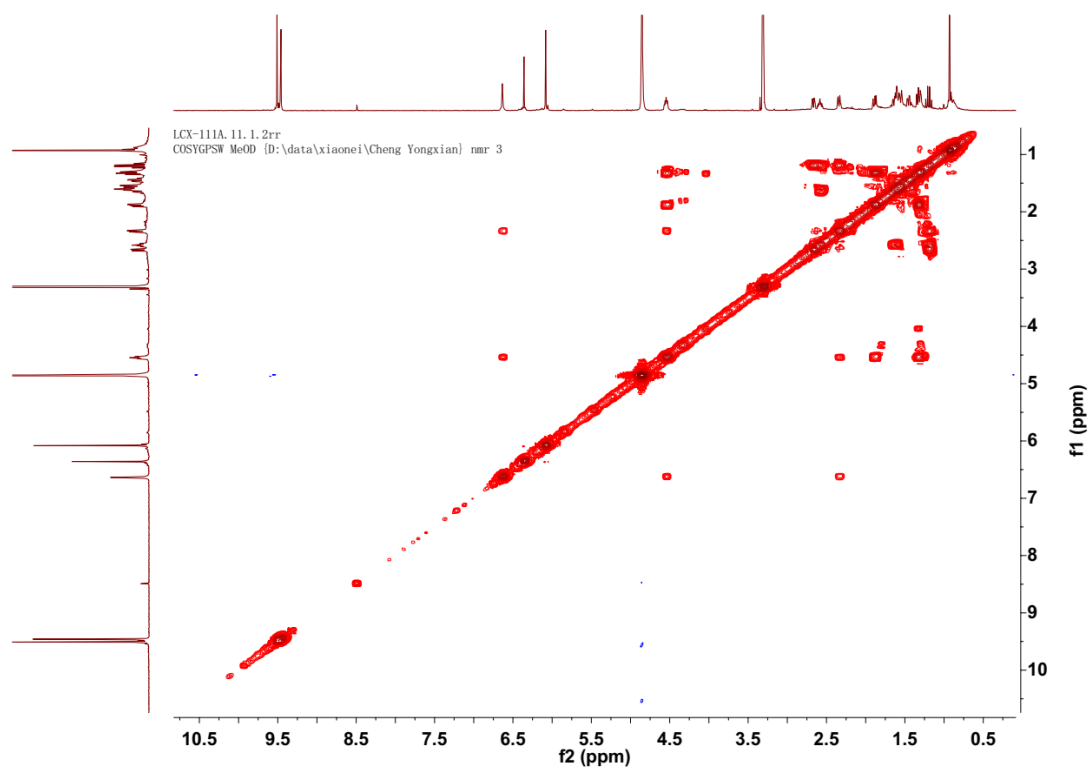

Figure S18.  $^1\text{H}$ - $^1\text{H}$  COSY spectrum of **3** in Methanol- $d_4$ .

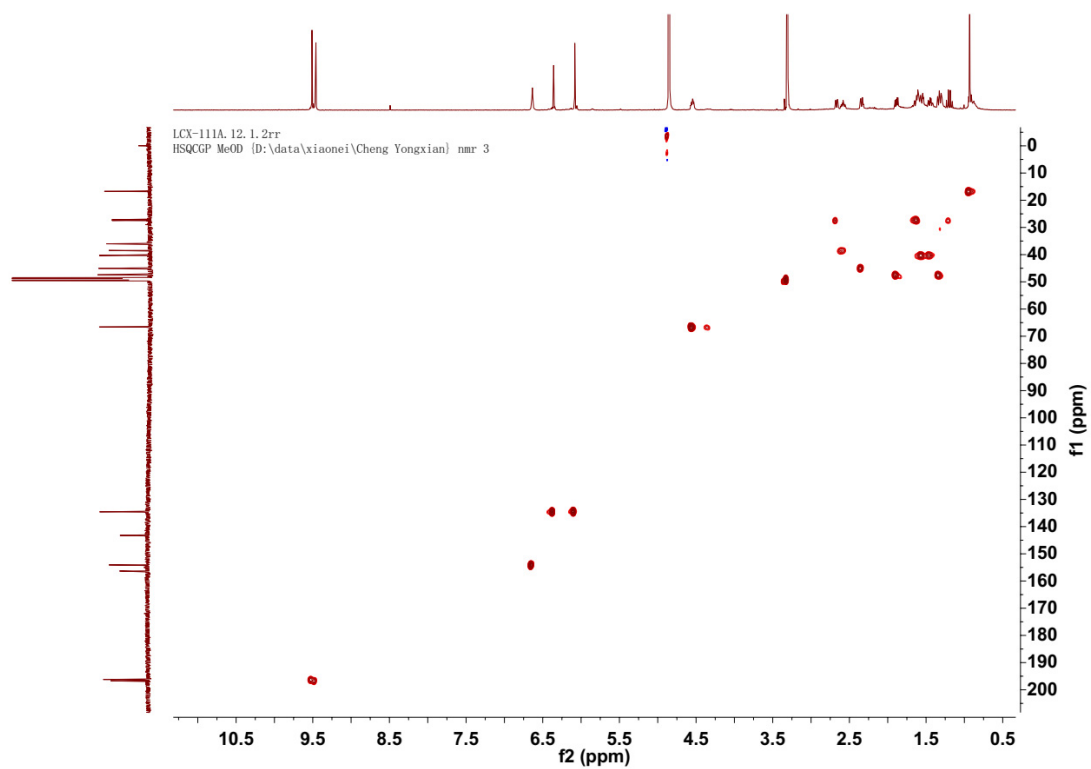

**Figure S19.** HSQC spectrum of **3** in Methanol- $d_4$ .

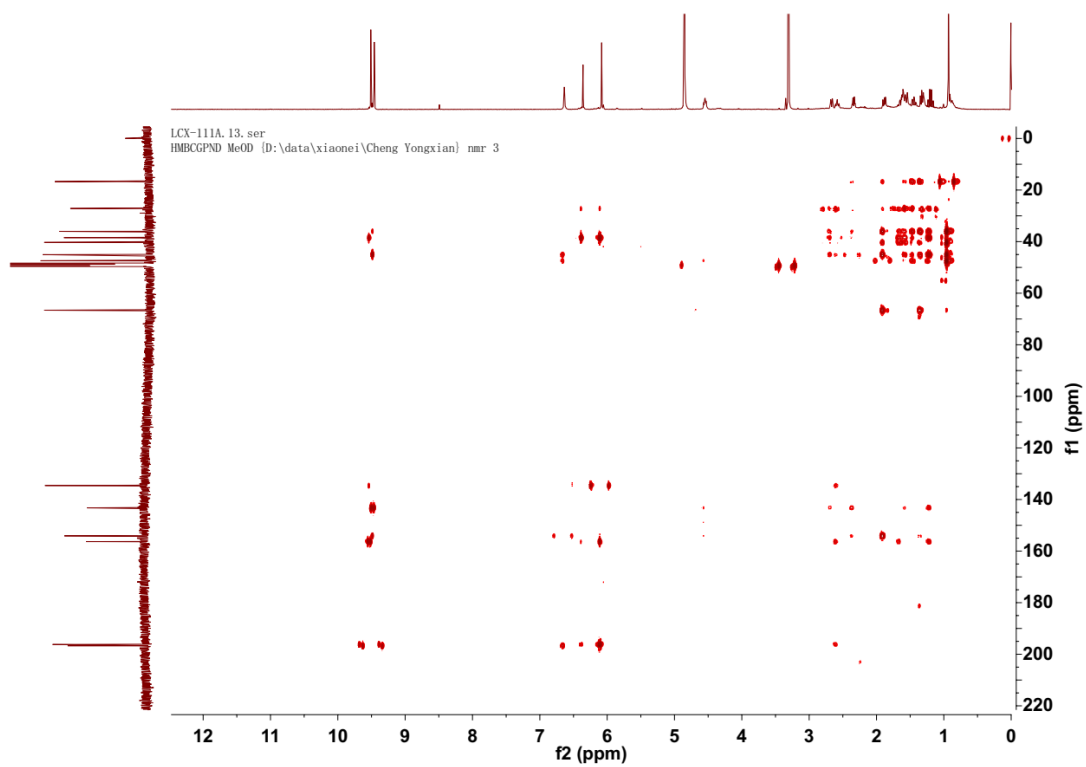

**Figure S20.** HMBC spectrum of **3** in Methanol- $d_4$ .

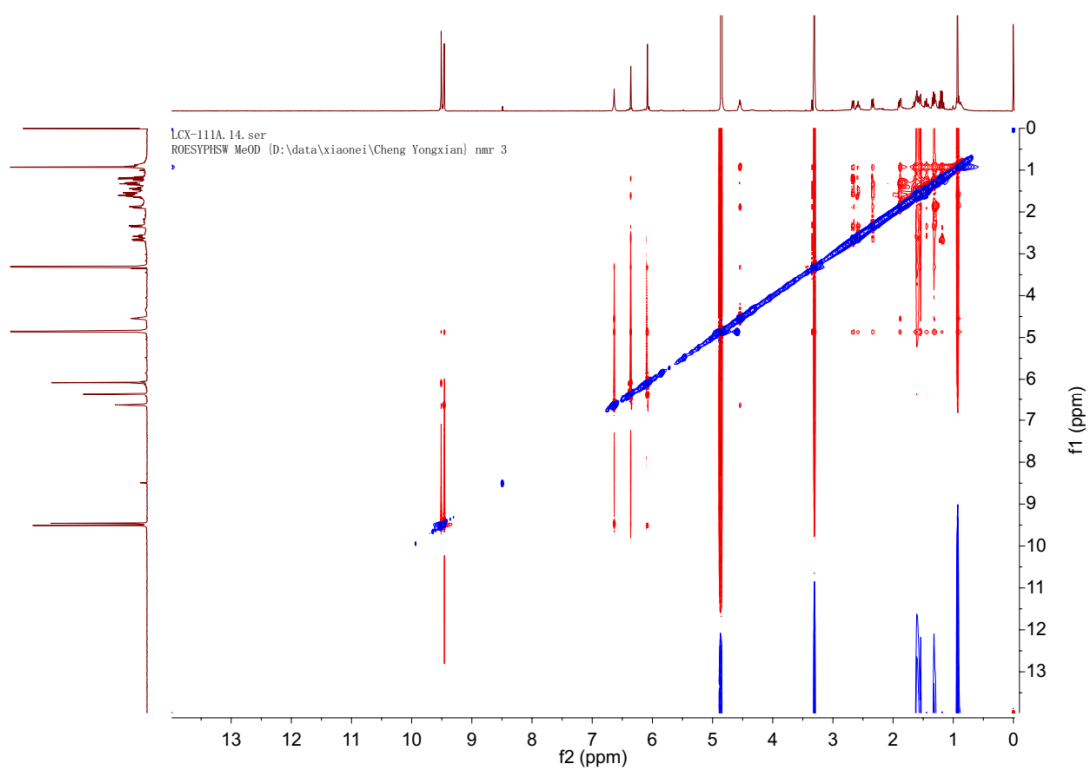

**Figure S21.** ROESY spectrum of **3** in Methanol-*d*<sub>4</sub>.

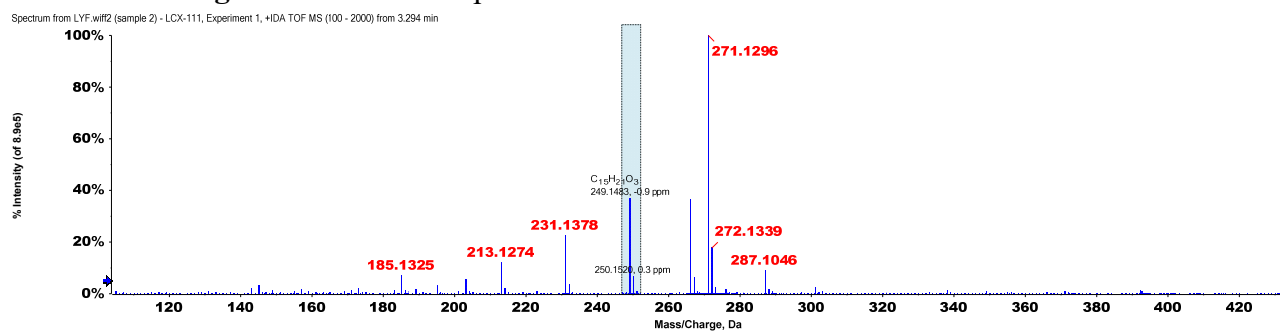

| Hit | Formula  | m/z      | RDB | ppm  | MS Rank | MSMS ppm | MSMS Rank | Found |
|-----|----------|----------|-----|------|---------|----------|-----------|-------|
| 1   | C15H20O3 | 249.1485 | 6.0 | -0.9 | 1       |          |           | NA/NA |

**Figure S22.** HRESIMS of **3**.

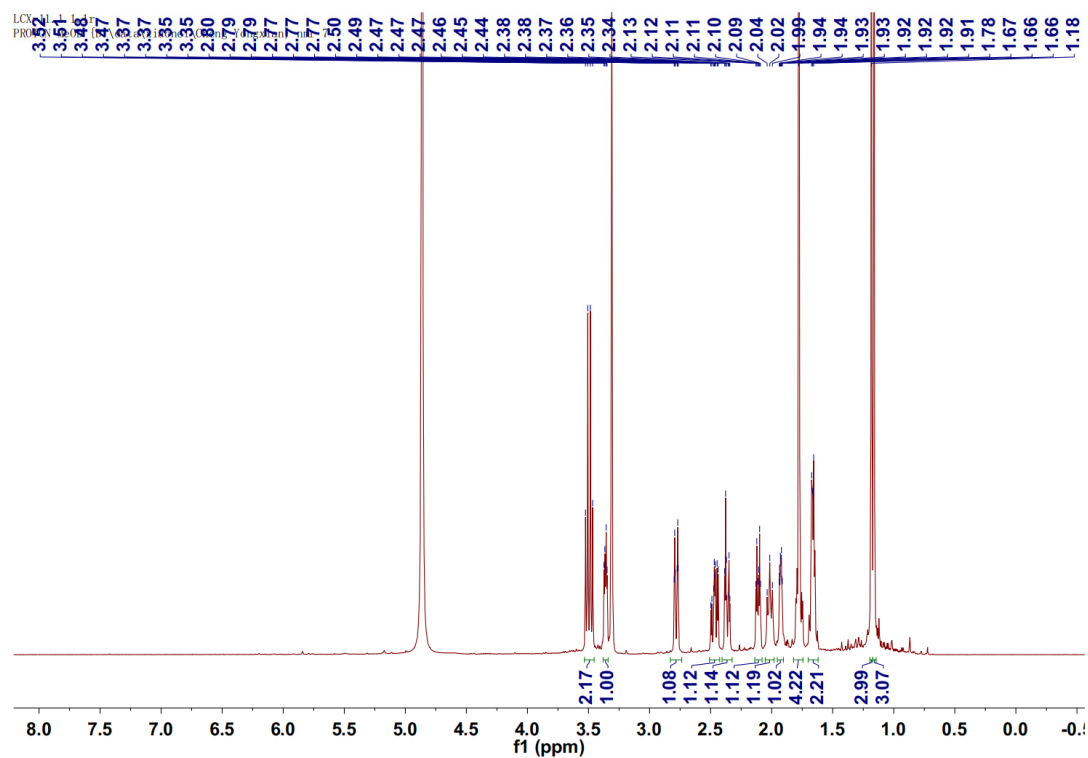

Figure S23.  $^1\text{H}$  NMR spectrum of **4** in Methanol- $d_4$ .

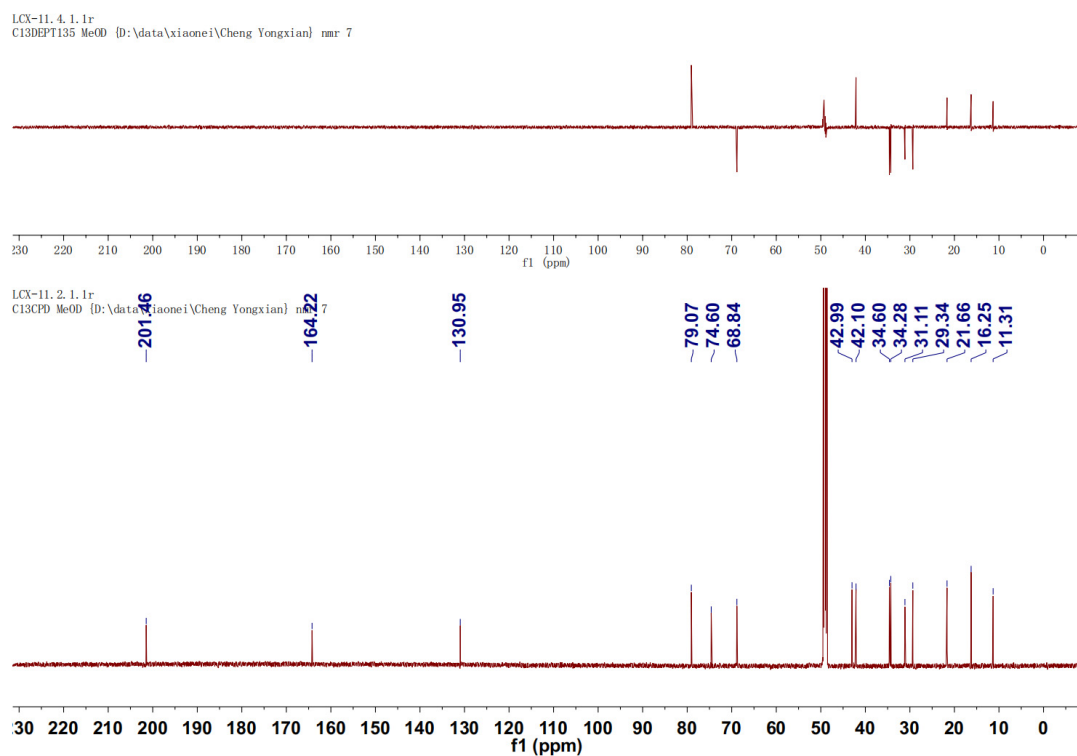

Figure S24.  $^{13}\text{C}$  NMR and DEPT spectra of **4** in Methanol- $d_4$ .

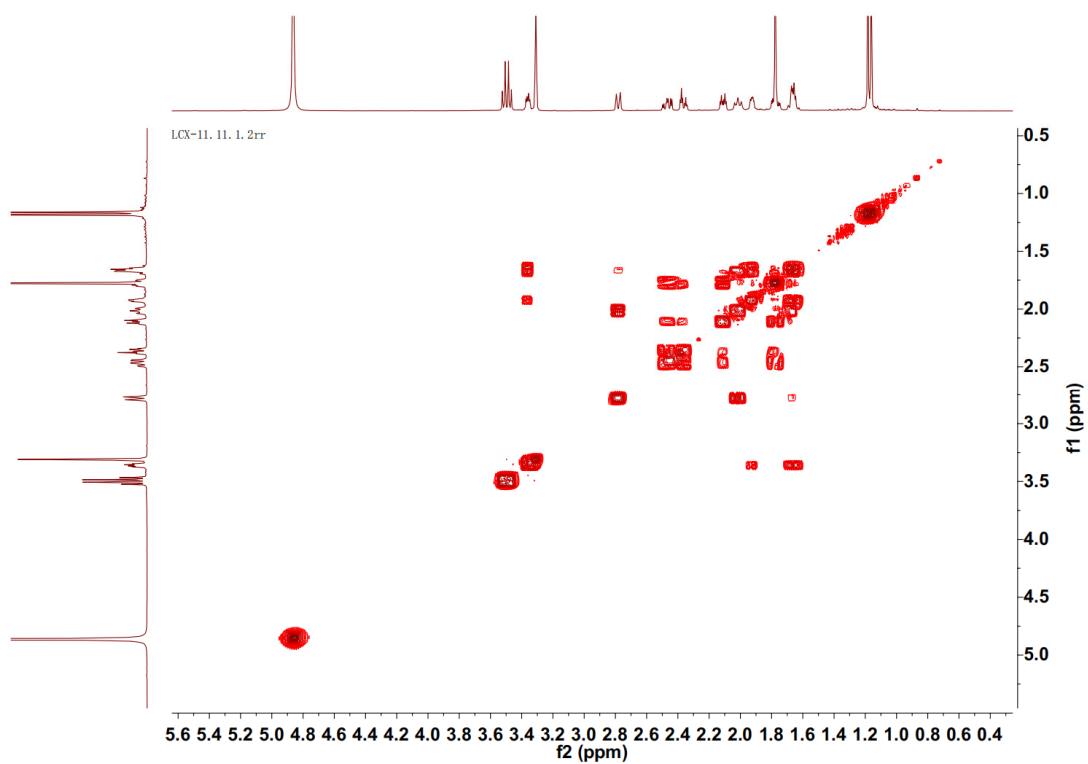

**Figure S25.**  $^1\text{H}$ - $^1\text{H}$  COSY spectrum of **4** in Methanol- $d_4$ .

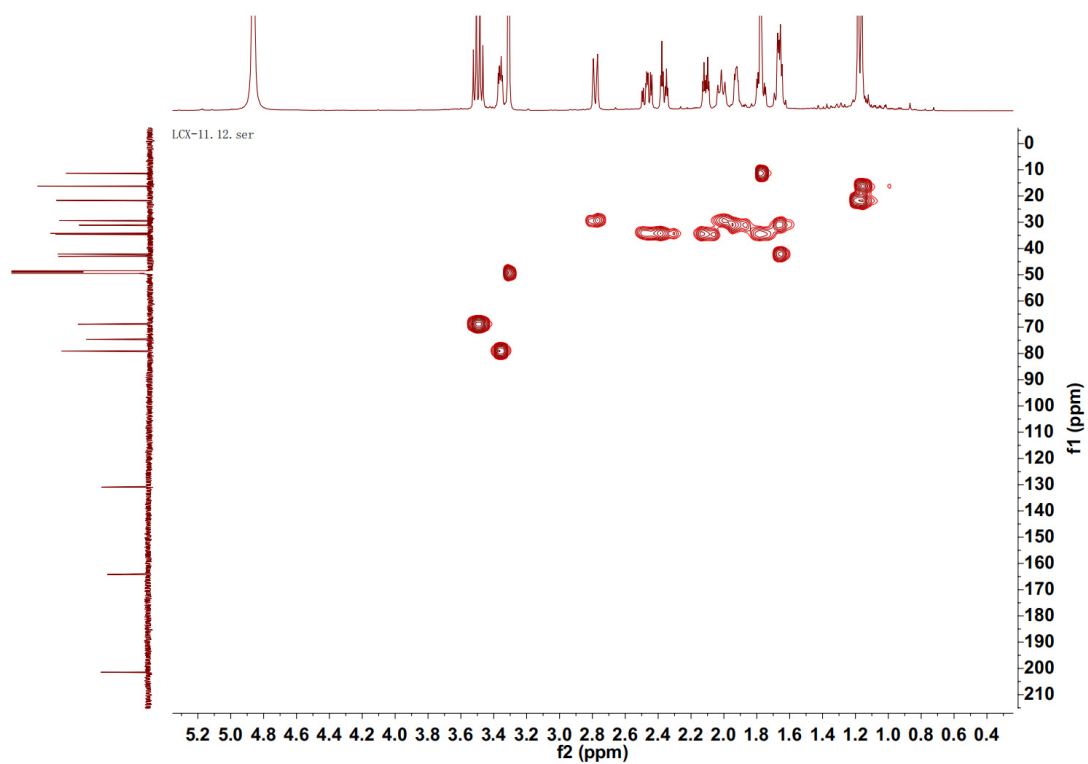

**Figure S26.** HSQC spectrum of **4** in Methanol- $d_4$ .

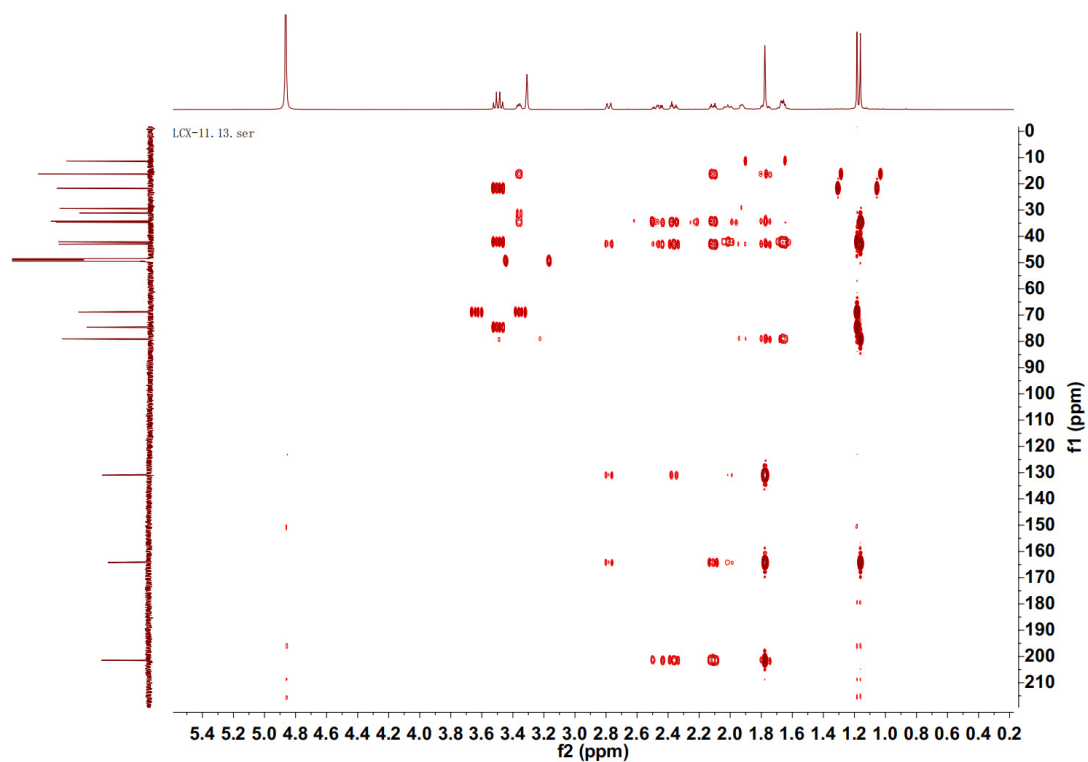

**Figure S27.** HMBC spectrum of **4** in Methanol- $d_4$ .

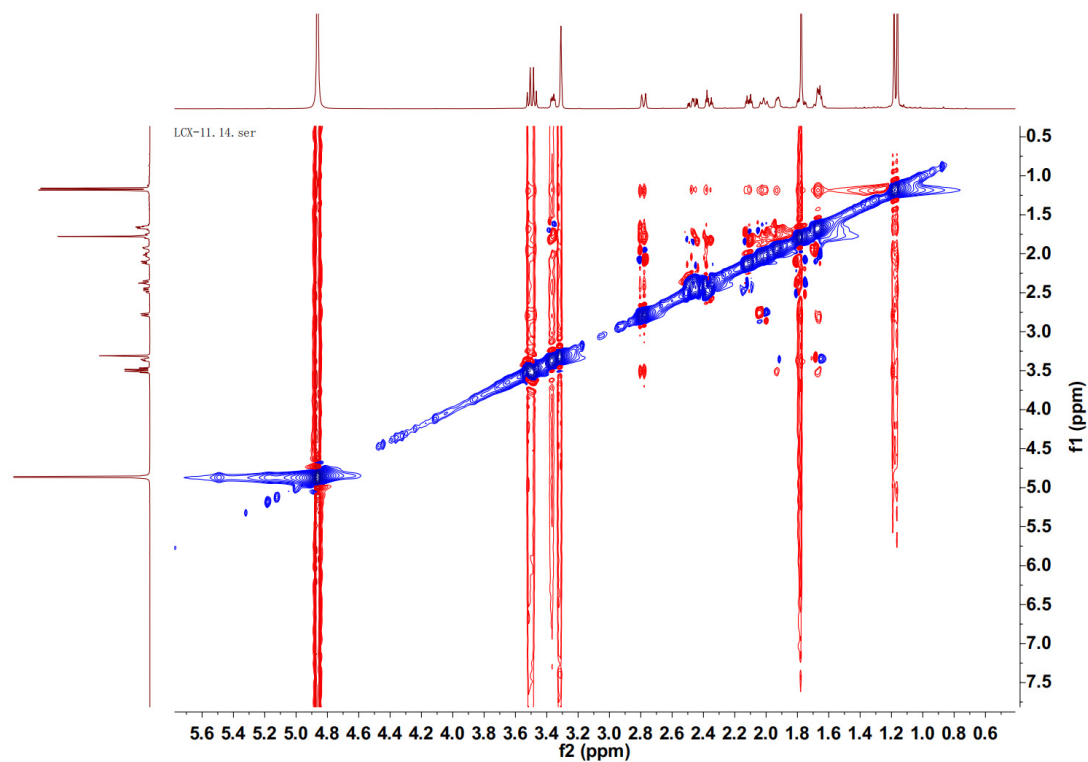

**Figure S28.** ROESY spectrum of **4** in Methanol- $d_4$ .



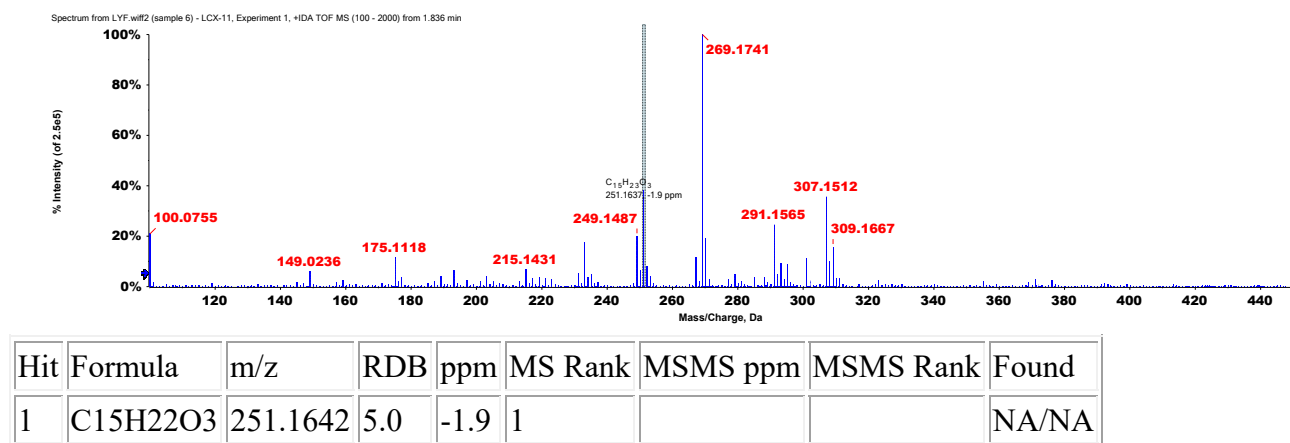

**Figure S29.** HRESIMS of **4**.

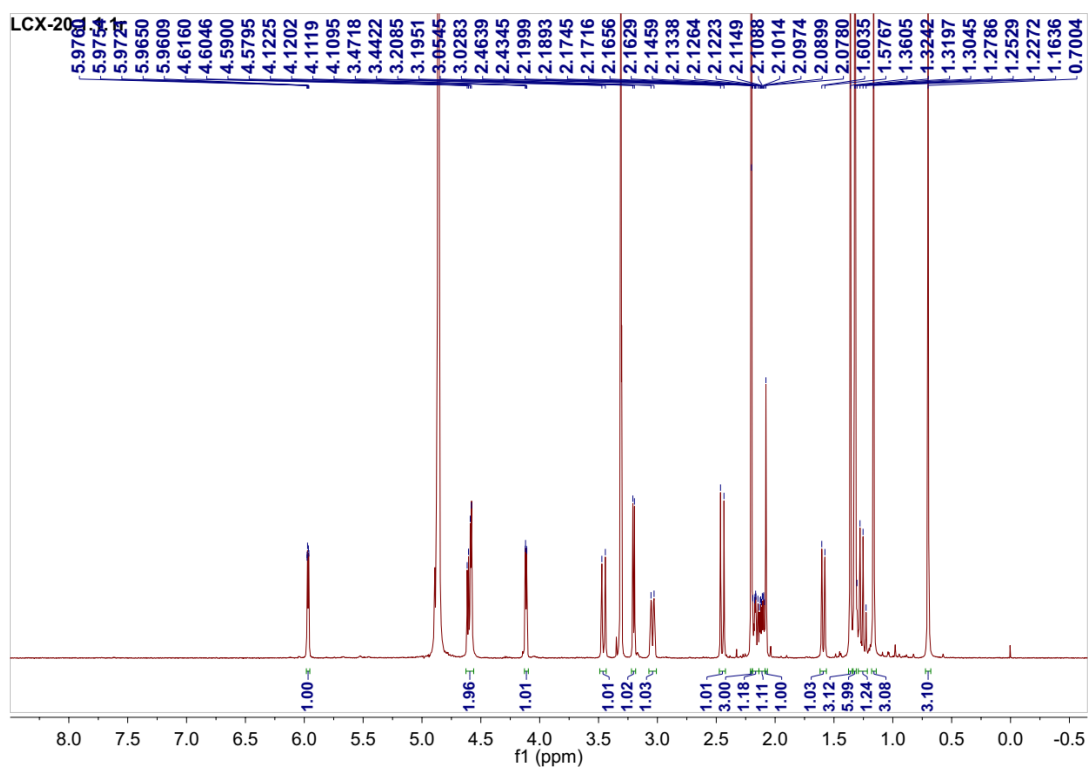

**Figure S30.**  $^1\text{H}$  NMR spectrum of **5** in Methanol- $d_4$ .

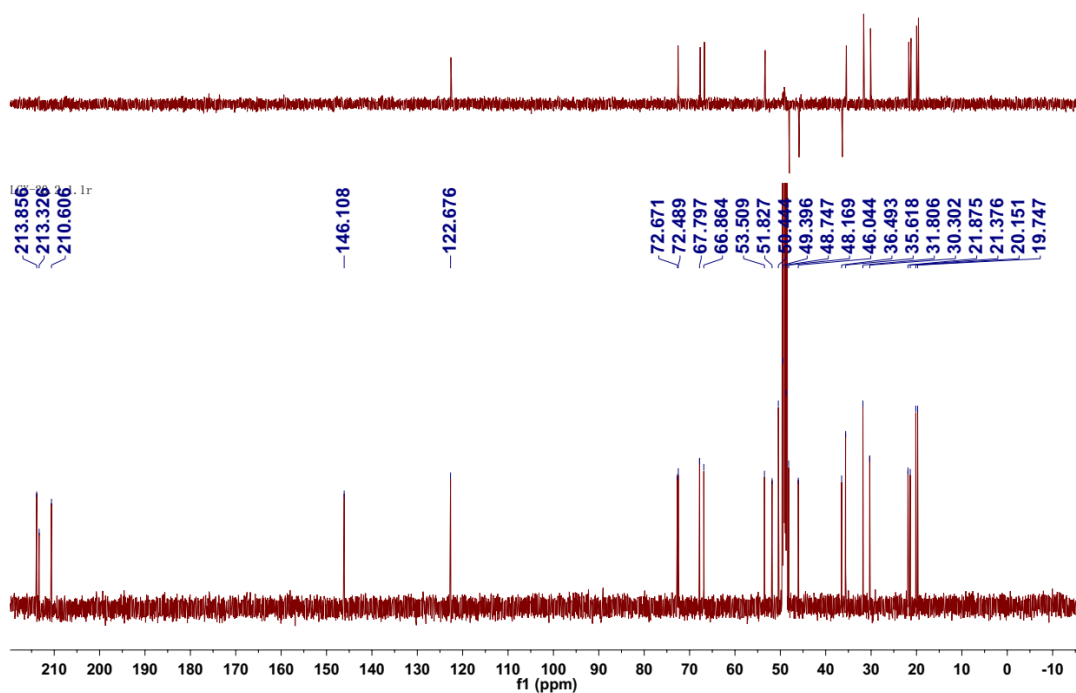

Figure S31.  $^{13}\text{C}$  NMR and DEPT spectra of **5** in Methanol- $d_4$ .

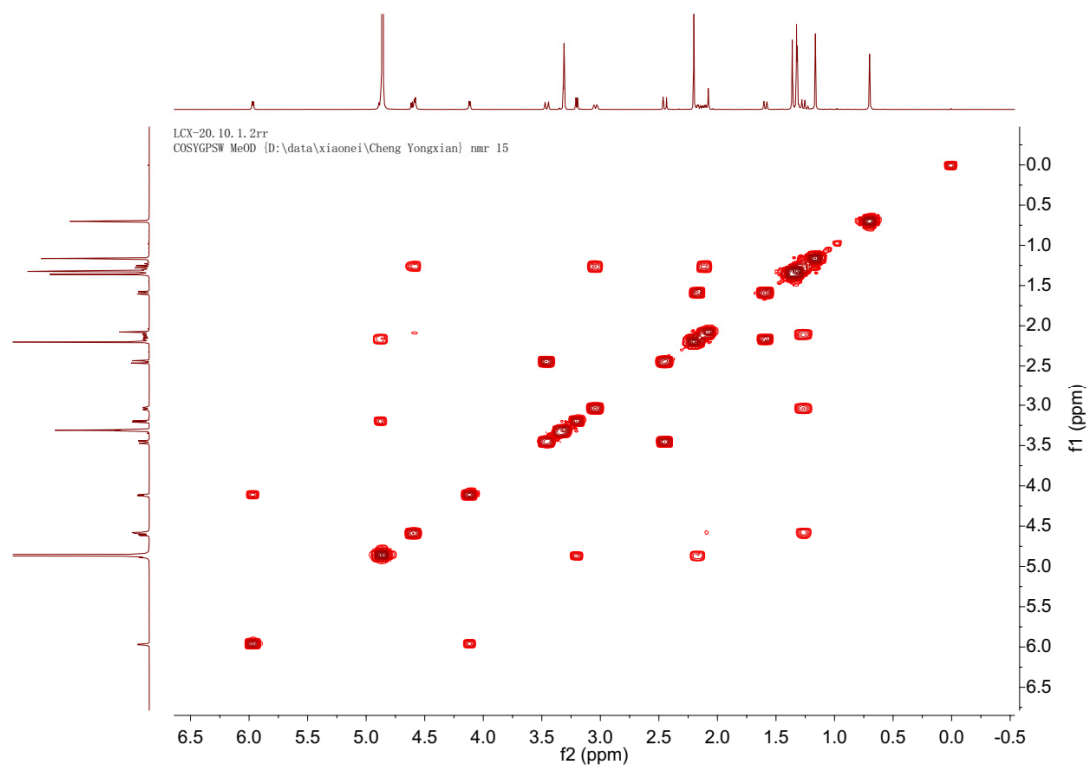

Figure S32. HSQC spectrum of **5** in Methanol- $d_4$ .

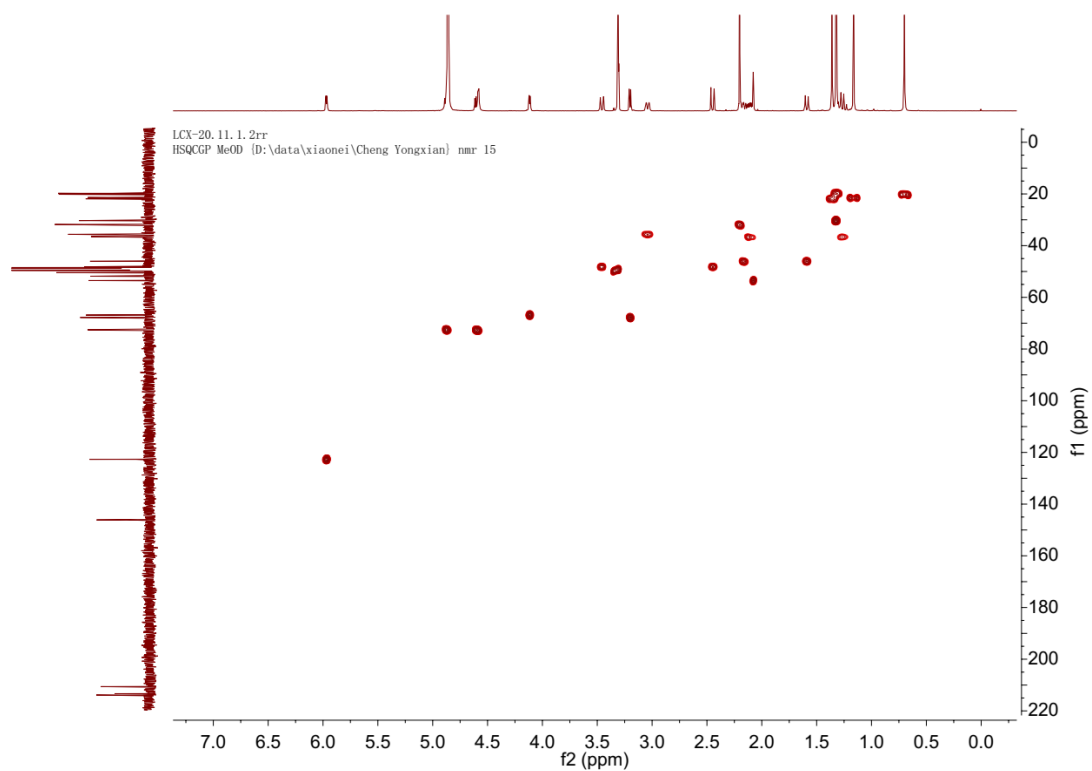

**Figure S33.** HSQC spectrum of **5** in Methanol- $d_4$ .

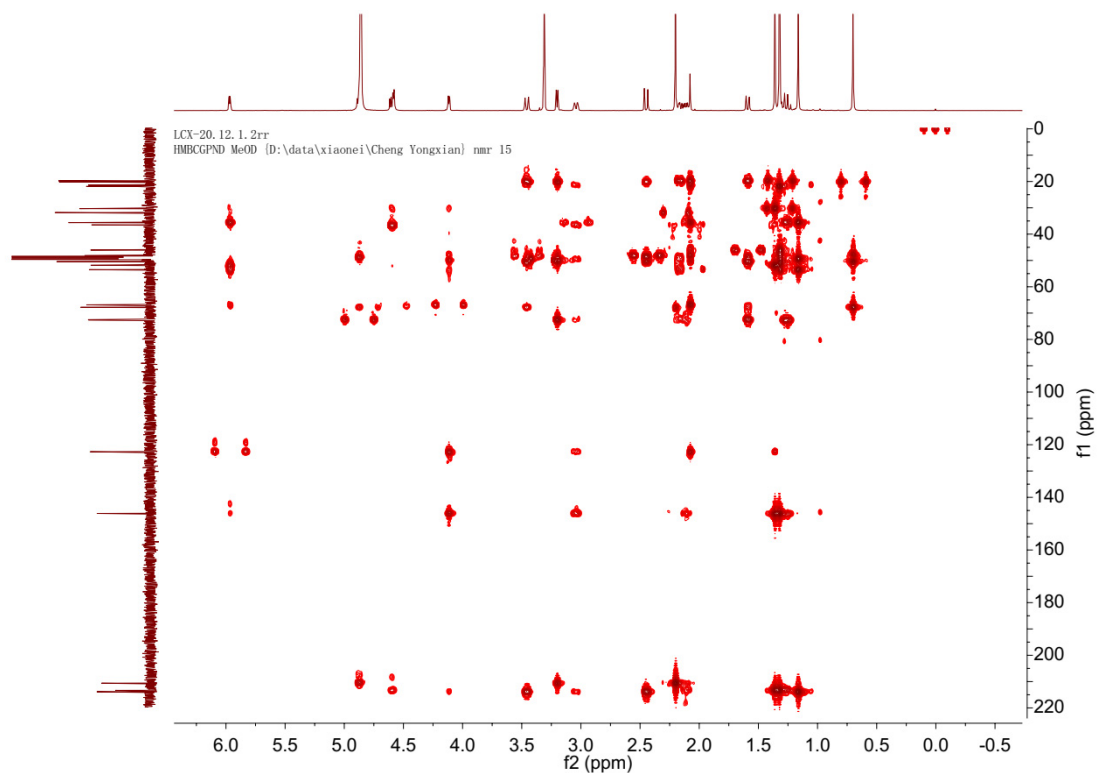

**Figure S34.** HMBC spectrum of **5** in Methanol- $d_4$ .

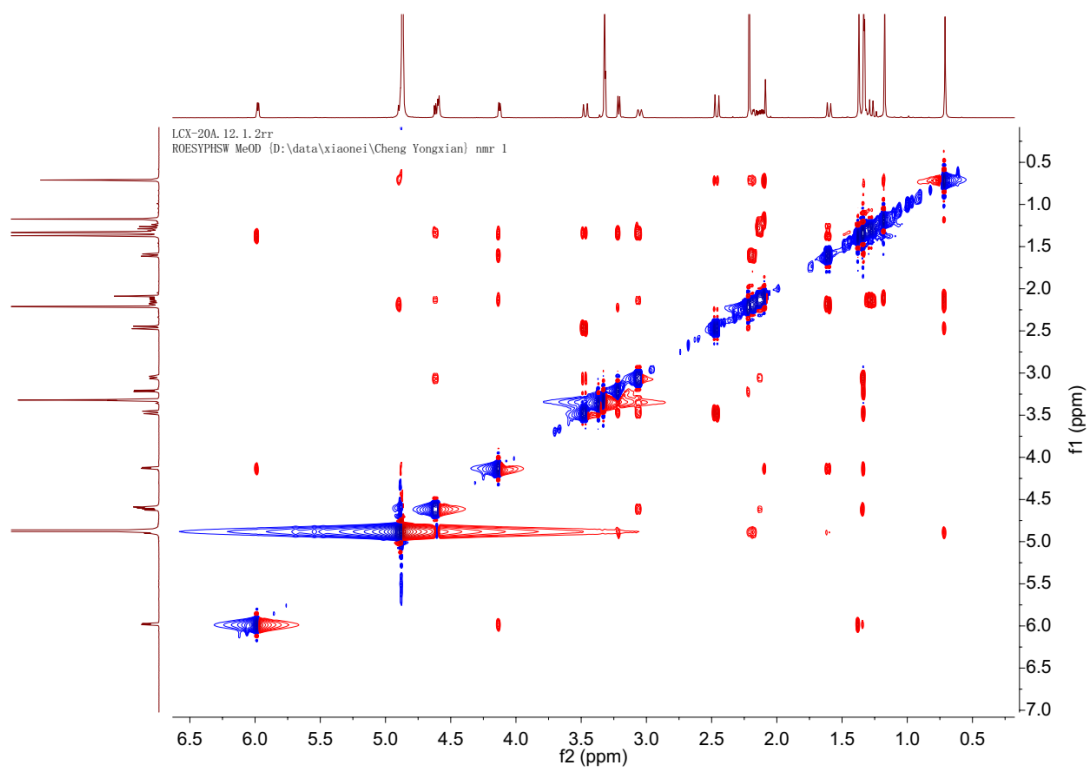

**Figure S35.** ROESY spectrum of **5** in Methanol- $d_4$ .

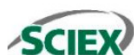

Created with SCIEX OS 1.4.1  
Printed: 18/1/2021 4:13:29 PM

|                    |                       |                 |           |
|--------------------|-----------------------|-----------------|-----------|
| Acquisition Date   | 18/1/2021 11:50:32 AM | Result Table    | LCX-20    |
| Acquisition Method | N/A                   | Algorithm Used  | AutoPeak  |
| Project            | N/A                   | Instrument Name | X500 QTOF |

#### Mass Spectra

● Spectrum from LCX-20.wiff2 (sample 1) ~..., Experiment 1, from 2.699 to 2.713 min  
● [C<sub>24</sub>H<sub>34</sub>O<sub>6</sub>+Na]<sup>+</sup>

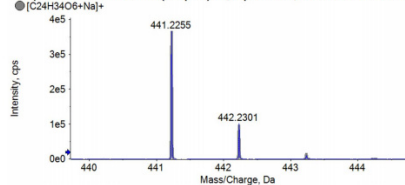

| # | Analyte Peak Name | Formula                                        | Precursor Mass | Found At Mass | Mass Error (ppm) |
|---|-------------------|------------------------------------------------|----------------|---------------|------------------|
| 1 | LCX-20            | C <sub>24</sub> H <sub>34</sub> O <sub>6</sub> | 441.2250       | 441.2255      | 1.6              |

**Figure S36.** HRESIMS of **5**.

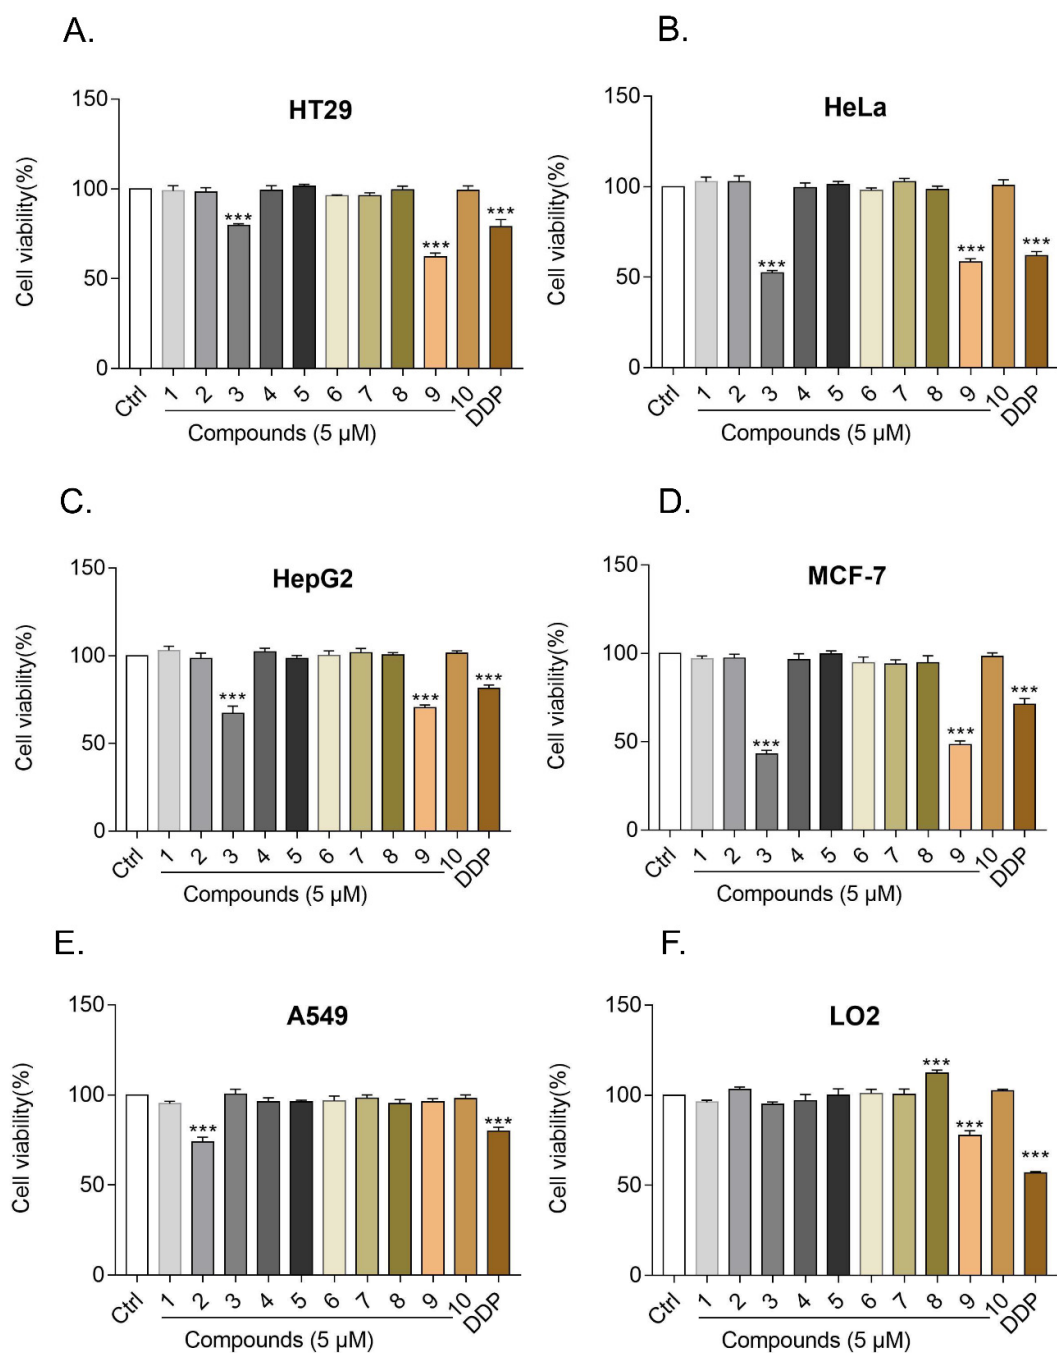

**Figure S37. Effects of Compound 1-10 and DDP on cell viability in human cancer cells.** HT29, HeLa, HepG2, MCF-7, A549, and LO2 cells were treated with 5 $\mu$ M compound 1-10 or DDP for 24 h followed by MTT assay. \*\*\* $p$  < 0.001; \* $p$  < 0.05 is defined as statistical significance.

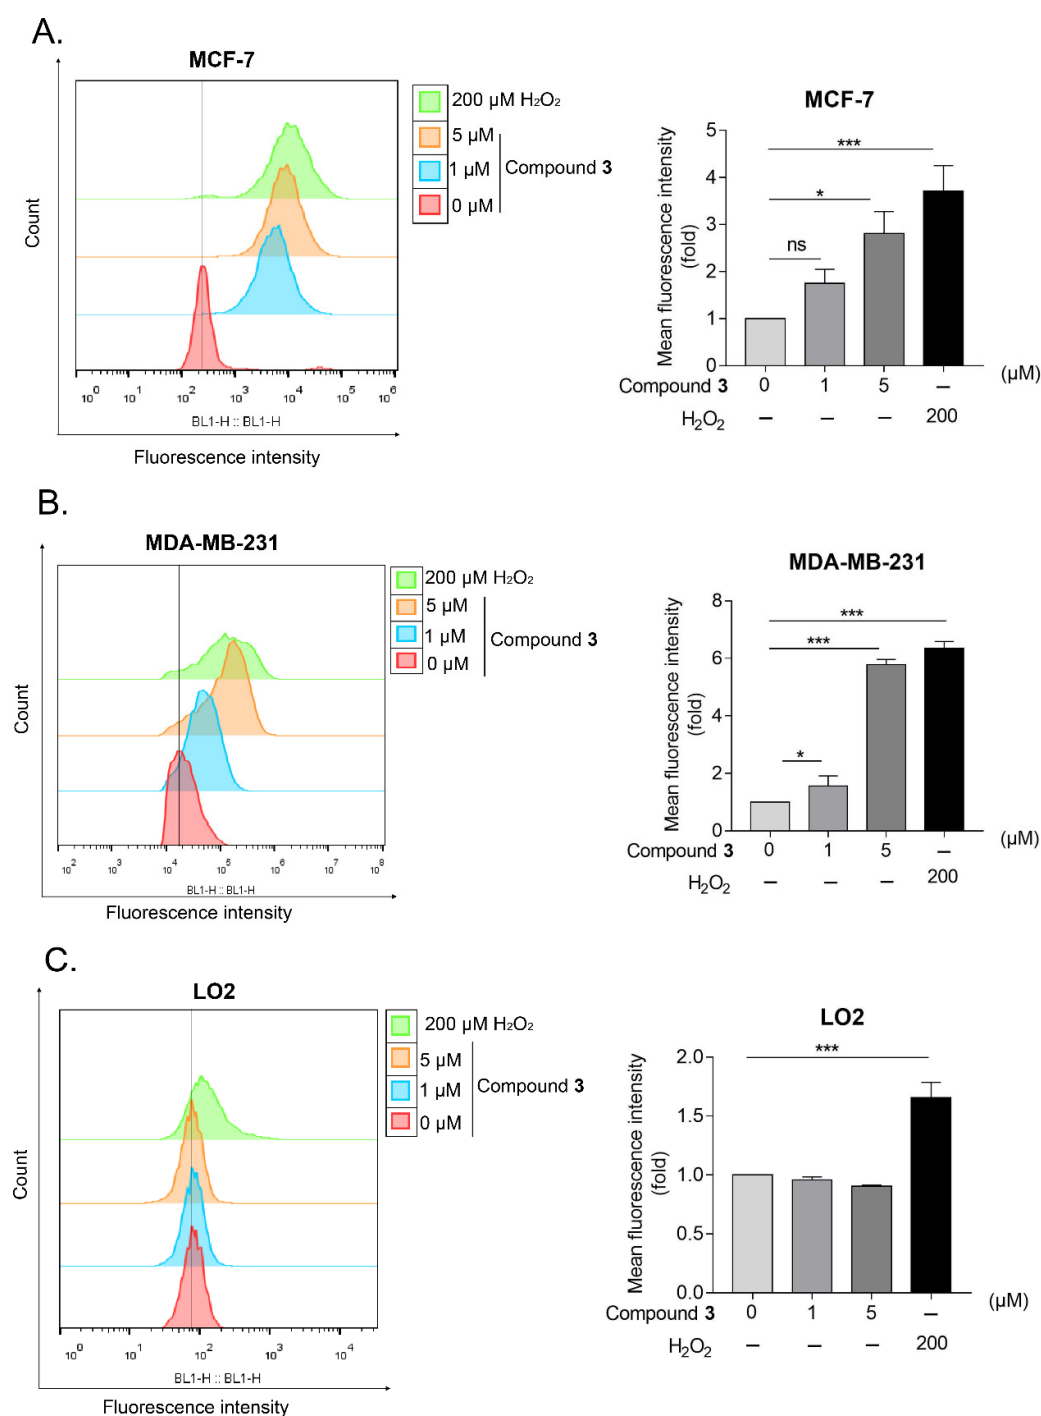

**Figure S38. Compound 3 promoted the production of reactive oxygen species in human breast cancer cells.** MCF-7 (A), MDA-MB-231 (B), and LO2 cells (C) were treated with indicated concentration of compound 3 or H<sub>2</sub>O<sub>2</sub> for 24 h. Then the ROS detection kit was performed to measure the intracellular ROS level and the fluorescence intensity in the cells was detected by flow cytometry and the bar chart showed relative mean fluorescence intensity by FlowJo software. \* $p < 0.05$ , \*\*\* $p < 0.001$ ; \* $p < 0.05$  is defined as statistical significance, ns represents non-significant effects.

## Crystal structure determination of 1

**Crystal Data** for  $C_{15}H_{18}O_4$  ( $M=262.29$  g/mol): monoclinic, space group  $P2_1$  (no. 4),  $a = 8.5199(2)$  Å,  $b = 8.1291(2)$  Å,  $c = 9.3413(2)$  Å,  $\beta = 92.277(2)^\circ$ ,  $V = 646.46(3)$  Å<sup>3</sup>,  $Z = 2$ ,  $T = 169.99(10)$  K,  $\mu(\text{Cu K}\alpha) = 0.797$  mm<sup>-1</sup>,  $D_{\text{calc}} = 1.347$  g/cm<sup>3</sup>, 6394 reflections measured ( $9.476^\circ \leq 2\Theta \leq 147.736^\circ$ ), 2411 unique ( $R_{\text{int}} = 0.0324$ ,  $R_{\text{sigma}} = 0.0265$ ) which were used in all calculations. The final  $R_1$  was 0.0455 ( $I > 2\sigma(I)$ ) and  $wR_2$  was 0.1164 (all data).

**Table S1 Crystal data and structure refinement for 1.**

|                                               |                                                                  |
|-----------------------------------------------|------------------------------------------------------------------|
| Identification code                           | 55                                                               |
| Empirical formula                             | $C_{15}H_{18}O_4$                                                |
| Formula weight                                | 262.29                                                           |
| Temperature/K                                 | 169.99(10)                                                       |
| Crystal system                                | monoclinic                                                       |
| Space group                                   | $P2_1$                                                           |
| $a/\text{\AA}$                                | 8.5199(2)                                                        |
| $b/\text{\AA}$                                | 8.1291(2)                                                        |
| $c/\text{\AA}$                                | 9.3413(2)                                                        |
| $\alpha/^\circ$                               | 90                                                               |
| $\beta/^\circ$                                | 92.277(2)                                                        |
| $\gamma/^\circ$                               | 90                                                               |
| Volume/Å <sup>3</sup>                         | 646.46(3)                                                        |
| $Z$                                           | 2                                                                |
| $\rho_{\text{calc}}/\text{g/cm}^3$            | 1.347                                                            |
| $\mu/\text{mm}^{-1}$                          | 0.797                                                            |
| $F(000)$                                      | 280.0                                                            |
| Crystal size/mm <sup>3</sup>                  | $0.14 \times 0.12 \times 0.1$                                    |
| Radiation                                     | Cu K $\alpha$ ( $\lambda = 1.54184$ )                            |
| $2\Theta$ range for data collection/ $^\circ$ | 9.476 to 147.736                                                 |
| Index ranges                                  | $-10 \leq h \leq 7, -9 \leq k \leq 9, -11 \leq l \leq 11$        |
| Reflections collected                         | 6394                                                             |
| Independent reflections                       | 2411 [ $R_{\text{int}} = 0.0324$ , $R_{\text{sigma}} = 0.0265$ ] |
| Data/restraints/parameters                    | 2411/1/184                                                       |
| Goodness-of-fit on $F^2$                      | 1.164                                                            |
| Final R indexes [ $I \geq 2\sigma(I)$ ]       | $R_1 = 0.0455$ , $wR_2 = 0.1155$                                 |
| Final R indexes [all data]                    | $R_1 = 0.0459$ , $wR_2 = 0.1164$                                 |
| Largest diff. peak/hole / e Å <sup>-3</sup>   | 0.25/-0.37                                                       |
| Flack/Hoof parameter                          | 0.02(15)/0.07(6)                                                 |

**Table S2 Fractional Atomic Coordinates ( $\times 10^4$ ) and Equivalent Isotropic Displacement Parameters ( $\text{\AA}^2 \times 10^3$ ) for 1.  $U_{eq}$  is defined as 1/3 of the trace of the orthogonalised  $U_{ij}$  tensor.**

| Atom | x        | y       | z           | U(eq)   |
|------|----------|---------|-------------|---------|
| O1   | 3032(2)  | 5291(3) | 4748(2)     | 31.4(5) |
| O2   | 11030(2) | 4158(3) | 6905(2)     | 29.0(5) |
| O3   | 11204(2) | 7329(3) | 7776(2)     | 35.4(5) |
| O4   | 8415(2)  | 5296(3) | 10454.0(19) | 29.1(5) |
| C1   | 6235(3)  | 6149(3) | 7042(3)     | 17.6(5) |
| C2   | 4696(3)  | 5877(3) | 6819(3)     | 22.5(6) |
| C3   | 4343(3)  | 5507(4) | 5312(3)     | 23.1(6) |
| C4   | 5878(3)  | 5431(3) | 4546(3)     | 20.7(5) |
| C5   | 7112(3)  | 6099(3) | 5655(2)     | 17.6(5) |
| C6   | 8670(3)  | 5136(4) | 5674(3)     | 22.9(6) |
| C7   | 9607(3)  | 4993(3) | 7131(3)     | 20.0(5) |
| C8   | 9899(3)  | 6714(4) | 7736(3)     | 21.7(6) |
| C9   | 8502(3)  | 7630(3) | 8279(3)     | 21.2(6) |
| C10  | 7045(3)  | 6552(3) | 8471(2)     | 18.4(5) |
| C11  | 8649(3)  | 3977(4) | 8154(3)     | 20.1(5) |
| C12  | 8734(4)  | 2355(4) | 8184(3)     | 31.1(6) |
| C13  | 7588(3)  | 4903(3) | 9138(3)     | 20.3(5) |
| C14  | 5933(3)  | 7444(4) | 9456(3)     | 27.0(6) |
| C15  | 5799(4)  | 6293(5) | 3104(3)     | 31.4(7) |

**Table S3 Anisotropic Displacement Parameters ( $\text{\AA}^2 \times 10^3$ ) for 1. The Anisotropic displacement factor exponent takes the form:  $-2\pi^2[h^2a^{*2}U_{11}+2hka^*b^*U_{12}+\dots]$ .**

| Atom | U <sub>11</sub> | U <sub>22</sub> | U <sub>33</sub> | U <sub>23</sub> | U <sub>13</sub> | U <sub>12</sub> |
|------|-----------------|-----------------|-----------------|-----------------|-----------------|-----------------|
| O1   | 21.0(9)         | 43.7(13)        | 29.2(10)        | 3.7(9)          | -3.7(7)         | -4.0(9)         |
| O2   | 16.6(8)         | 32.3(12)        | 38.4(11)        | -1.8(9)         | 7.2(8)          | 5.4(8)          |
| O3   | 22.1(10)        | 37.9(13)        | 46.6(12)        | -11.1(11)       | 8.1(8)          | -9.8(9)         |
| O4   | 39.9(11)        | 30.5(12)        | 16.5(8)         | 1.7(8)          | -3.7(8)         | 6.8(10)         |
| C1   | 18.9(11)        | 16.9(12)        | 17.3(11)        | 2.2(9)          | 5.3(9)          | 2.2(9)          |
| C2   | 19.5(12)        | 27.1(15)        | 21.2(12)        | 2.9(10)         | 5.2(10)         | 1.6(10)         |
| C3   | 21.0(12)        | 23.3(15)        | 25.0(13)        | 3.0(10)         | 0.4(10)         | -0.9(10)        |
| C4   | 23.2(12)        | 19.2(13)        | 19.7(11)        | -0.9(10)        | 1.9(9)          | -0.5(10)        |
| C5   | 18.5(11)        | 19.6(13)        | 14.8(11)        | 0.5(9)          | 2.6(9)          | -1.1(9)         |
| C6   | 20.2(12)        | 29.9(16)        | 19.1(12)        | -3.1(11)        | 5.5(9)          | 2.3(10)         |
| C7   | 14.3(10)        | 23.1(15)        | 22.9(12)        | -1.7(10)        | 3.6(9)          | 2.6(9)          |
| C8   | 19.2(11)        | 25.9(15)        | 20.1(11)        | 1.0(10)         | 2.8(9)          | -1.8(10)        |
| C9   | 24.0(12)        | 19.5(15)        | 20.2(11)        | -0.9(10)        | 1.7(9)          | -0.5(10)        |



|     |          |          |          |          |         |          |
|-----|----------|----------|----------|----------|---------|----------|
| C10 | 18.4(11) | 21.0(14) | 16.0(11) | 3.2(10)  | 2.7(9)  | 2.7(10)  |
| C11 | 18.3(11) | 21.4(14) | 20.5(12) | -0.4(9)  | -1.4(9) | 0.1(10)  |
| C12 | 38.4(15) | 21.2(16) | 34.2(15) | 2.5(12)  | 6.5(12) | 2.2(13)  |
| C13 | 21.1(11) | 22.6(15) | 17.4(11) | 4.2(9)   | 2.5(9)  | 1.5(10)  |
| C14 | 29.1(13) | 32.8(16) | 19.6(12) | -0.6(11) | 6.3(10) | 9.6(12)  |
| C15 | 34.3(15) | 43.0(19) | 17.0(12) | 1.1(12)  | 2.1(10) | -4.6(14) |

**Table S4 Bond Lengths for 1.**

| Atom | Atom | Length/Å | Atom | Atom | Length/Å |
|------|------|----------|------|------|----------|
| O1   | C3   | 1.228(3) | C5   | C6   | 1.540(3) |
| O2   | C7   | 1.413(3) | C6   | C7   | 1.554(3) |
| O3   | C8   | 1.219(3) | C7   | C8   | 1.526(4) |
| O4   | C13  | 1.429(3) | C7   | C11  | 1.524(4) |
| C1   | C2   | 1.338(4) | C8   | C9   | 1.509(4) |
| C1   | C5   | 1.522(3) | C9   | C10  | 1.536(4) |
| C1   | C10  | 1.514(3) | C10  | C13  | 1.541(3) |
| C2   | C3   | 1.460(4) | C10  | C14  | 1.529(3) |
| C3   | C4   | 1.517(3) | C11  | C12  | 1.321(5) |
| C4   | C5   | 1.545(3) | C11  | C13  | 1.514(4) |
| C4   | C15  | 1.517(4) |      |      |          |

**Table S5 Bond Angles for 1.**

| Atom | Atom | Atom | Angle/°    | Atom | Atom | Atom | Angle/°  |
|------|------|------|------------|------|------|------|----------|
| C2   | C1   | C5   | 112.0(2)   | C11  | C7   | C6   | 108.7(2) |
| C2   | C1   | C10  | 125.6(2)   | C11  | C7   | C8   | 110.4(2) |
| C10  | C1   | C5   | 122.3(2)   | O3   | C8   | C7   | 121.5(2) |
| C1   | C2   | C3   | 110.3(2)   | O3   | C8   | C9   | 121.2(3) |
| O1   | C3   | C2   | 126.3(2)   | C9   | C8   | C7   | 117.3(2) |
| O1   | C3   | C4   | 125.3(2)   | C8   | C9   | C10  | 114.2(2) |
| C2   | C3   | C4   | 108.4(2)   | C1   | C10  | C9   | 111.3(2) |
| C3   | C4   | C5   | 104.2(2)   | C1   | C10  | C13  | 106.7(2) |
| C3   | C4   | C15  | 113.0(2)   | C1   | C10  | C14  | 111.2(2) |
| C15  | C4   | C5   | 116.0(2)   | C9   | C10  | C13  | 108.2(2) |
| C1   | C5   | C4   | 103.65(19) | C14  | C10  | C9   | 108.8(2) |
| C1   | C5   | C6   | 117.1(2)   | C14  | C10  | C13  | 110.6(2) |
| C6   | C5   | C4   | 113.1(2)   | C12  | C11  | C7   | 121.6(2) |
| C5   | C6   | C7   | 117.4(2)   | C12  | C11  | C13  | 121.1(2) |

|    |    |     |          |     |     |     |          |
|----|----|-----|----------|-----|-----|-----|----------|
| O2 | C7 | C6  | 108.6(2) | C13 | C11 | C7  | 117.3(2) |
| O2 | C7 | C8  | 111.6(2) | O4  | C13 | C10 | 106.5(2) |
| O2 | C7 | C11 | 108.5(2) | O4  | C13 | C11 | 110.3(2) |
| C8 | C7 | C6  | 109.0(2) | C11 | C13 | C10 | 111.3(2) |

**Table S6 Torsion Angles for 1.**

| A  | B   | C   | D   | Angle/°   | A   | B   | C   | D   | Angle/°   |
|----|-----|-----|-----|-----------|-----|-----|-----|-----|-----------|
| O1 | C3  | C4  | C5  | 169.9(3)  | C5  | C6  | C7  | C8  | -54.8(3)  |
| O1 | C3  | C4  | C15 | 43.1(4)   | C5  | C6  | C7  | C11 | 65.6(3)   |
| O2 | C7  | C8  | O3  | 11.0(4)   | C6  | C7  | C8  | O3  | -109.0(3) |
| O2 | C7  | C8  | C9  | -169.2(2) | C6  | C7  | C8  | C9  | 70.8(3)   |
| O2 | C7  | C11 | C12 | -31.4(3)  | C6  | C7  | C11 | C12 | 86.5(3)   |
| O2 | C7  | C11 | C13 | 148.7(2)  | C6  | C7  | C11 | C13 | -93.3(3)  |
| O3 | C8  | C9  | C10 | -166.6(3) | C7  | C8  | C9  | C10 | 13.6(3)   |
| C1 | C2  | C3  | O1  | -175.7(3) | C7  | C11 | C13 | O4  | -90.1(3)  |
| C1 | C2  | C3  | C4  | 4.3(3)    | C7  | C11 | C13 | C10 | 27.9(3)   |
| C1 | C5  | C6  | C7  | -27.5(3)  | C8  | C7  | C11 | C12 | -154.0(3) |
| C1 | C10 | C13 | O4  | 177.4(2)  | C8  | C7  | C11 | C13 | 26.2(3)   |
| C1 | C10 | C13 | C11 | 57.1(3)   | C8  | C9  | C10 | C1  | -75.4(3)  |
| C2 | C1  | C5  | C4  | -9.9(3)   | C8  | C9  | C10 | C13 | 41.5(3)   |
| C2 | C1  | C5  | C6  | -135.2(2) | C8  | C9  | C10 | C14 | 161.7(2)  |
| C2 | C1  | C10 | C9  | -150.1(3) | C9  | C10 | C13 | O4  | 57.5(2)   |
| C2 | C1  | C10 | C13 | 92.1(3)   | C9  | C10 | C13 | C11 | -62.7(3)  |
| C2 | C1  | C10 | C14 | -28.6(4)  | C10 | C1  | C2  | C3  | -179.3(3) |
| C2 | C3  | C4  | C5  | -10.1(3)  | C10 | C1  | C5  | C4  | 173.0(2)  |
| C2 | C3  | C4  | C15 | -136.9(3) | C10 | C1  | C5  | C6  | 47.7(4)   |
| C3 | C4  | C5  | C1  | 11.6(3)   | C11 | C7  | C8  | O3  | 131.7(3)  |
| C3 | C4  | C5  | C6  | 139.4(2)  | C11 | C7  | C8  | C9  | -48.5(3)  |
| C4 | C5  | C6  | C7  | -148.0(2) | C12 | C11 | C13 | O4  | 90.1(3)   |
| C5 | C1  | C2  | C3  | 3.7(3)    | C12 | C11 | C13 | C10 | -151.9(3) |
| C5 | C1  | C10 | C9  | 26.6(3)   | C14 | C10 | C13 | O4  | -61.6(3)  |
| C5 | C1  | C10 | C13 | -91.2(3)  | C14 | C10 | C13 | C11 | 178.2(2)  |
| C5 | C1  | C10 | C14 | 148.1(3)  | C15 | C4  | C5  | C1  | 136.5(2)  |
| C5 | C6  | C7  | O2  | -176.5(2) | C15 | C4  | C5  | C6  | -95.6(3)  |

**Table S7 Hydrogen Atom Coordinates ( $\text{\AA} \times 10^4$ ) and Isotropic Displacement Parameters ( $\text{\AA}^2 \times 10^3$ ) for 1.**

| Atom | x        | y        | z        | U(eq)  |
|------|----------|----------|----------|--------|
| H2   | 11551.18 | 4686.43  | 6346.34  | 43     |
| H4   | 8472.83  | 4474.88  | 10963.3  | 44     |
| H2A  | 3956.52  | 5918.48  | 7524.52  | 27     |
| H4A  | 6118.49  | 4270.21  | 4377.33  | 25     |
| H5   | 7343.86  | 7237.15  | 5389.64  | 21     |
| H6A  | 9347.2   | 5650.76  | 4993.43  | 27     |
| H6B  | 8446.04  | 4032.08  | 5329.85  | 27     |
| H9A  | 8228.24  | 8509.89  | 7612.63  | 25     |
| H9B  | 8799.32  | 8130.95  | 9192.16  | 25     |
| H12A | 9500(50) | 1770(60) | 7560(50) | 45(11) |
| H12B | 8040(50) | 1670(60) | 8840(50) | 55(13) |
| H13  | 6669.72  | 4226.01  | 9334.07  | 24     |
| H14A | 5528.51  | 8413.51  | 8984.71  | 41     |
| H14B | 6493.81  | 7749.3   | 10326.75 | 41     |
| H14C | 5078.3   | 6728.12  | 9673.33  | 41     |
| H15A | 5582.66  | 7440.24  | 3239.66  | 47     |
| H15B | 4978.21  | 5812     | 2506.96  | 47     |
| H15C | 6785.17  | 6171.83  | 2653.13  | 47     |

### ECD calculation for compounds 2–5

Conformation search using molecular mechanics calculations was performed in CONFLEX version 7.0 with MMFF force field with an energy window for acceptable conformers (ewindow) of 5 kcal/mol above the ground state, a maximum number of conformations per molecule (maxconfs) of 100, and an RMSD cutoff (rmsd) of 0.5Å. Then the predominant conformers were optimized at B3LYP/6-311g(d,p) level in Gaussian 09 (Frisch et al. 2009) <sup>[1]</sup>. The optimized conformation geometries and thermodynamic parameters of all selected conformations were provided. The optimized conformers of **2–5** were used for the ECD calculation, which were performed with Gaussian 09 (B3LYP/6-311g(d,p)). The solvent effects were taken into account by the polarizable-conductor calculation model (PCM, methanol as the solvent). Percentages for each conformation are shown in Table S1.

### Selected conformation of **1** and their percentage

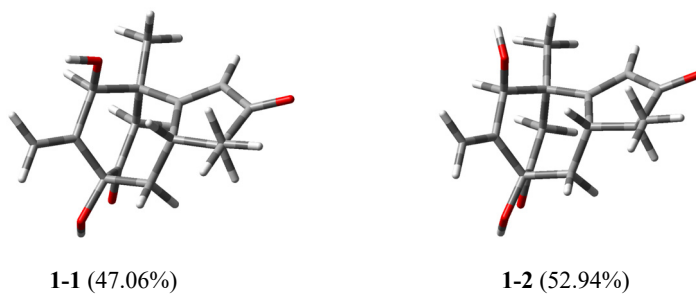

**Figure S39.** The lowest energy conformers of **1** (the relative populations are in parentheses).

**Selected conformation of 2 and their percentage**

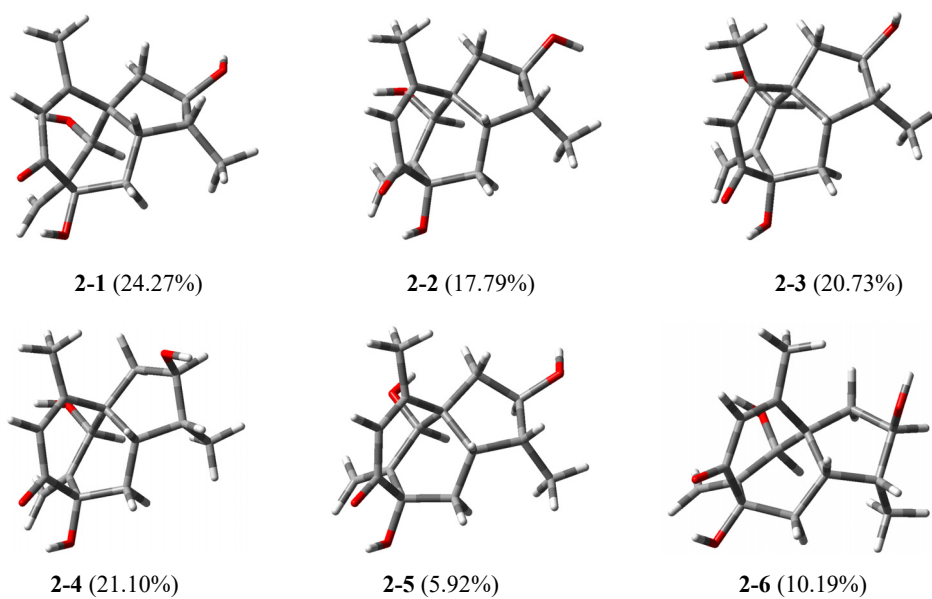

**Figure S40.** The lowest energy conformers of **2** (the relative populations are in parentheses).

**Selected conformation of 3 and their percentage**

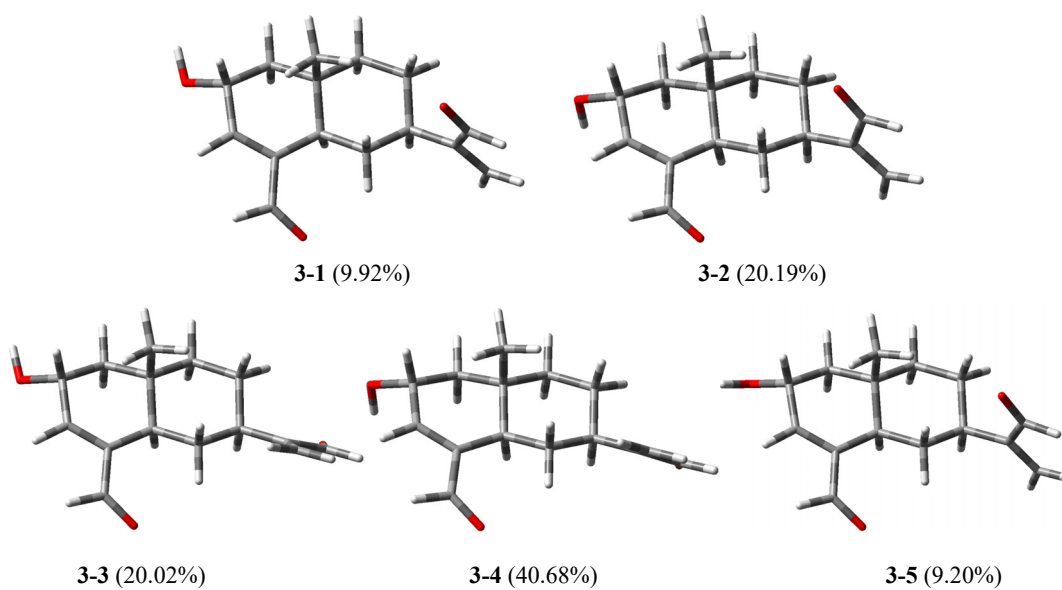

**Figure S41.** The lowest energy conformers of **3** (the relative populations are in parentheses).

**Selected conformation of 4 and their percentage**

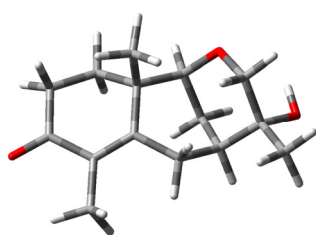

**4-1** (52.91%)

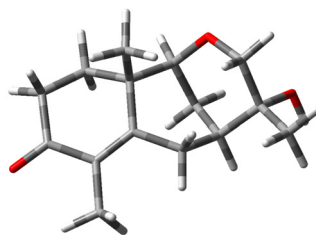

**4-2** (47.09%)

**Figure S42.** The lowest energy conformers of **4** (the relative populations are in parentheses).

**Selected conformation of 5 and their percentage**

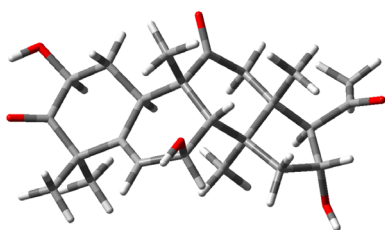

**5-1** (24.79%)

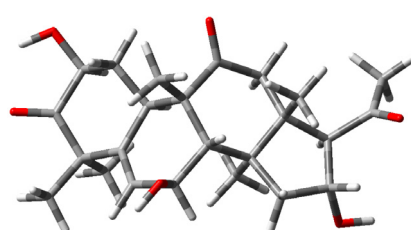

**5-2** (20.55%)

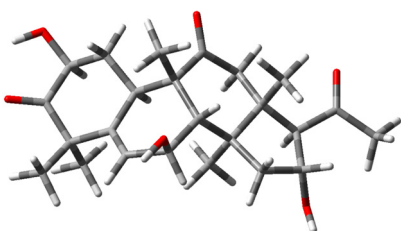

**5-3** (7.96%)

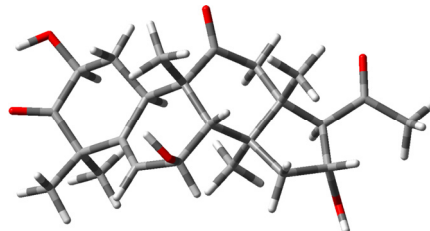

**5-4** (9.86%)

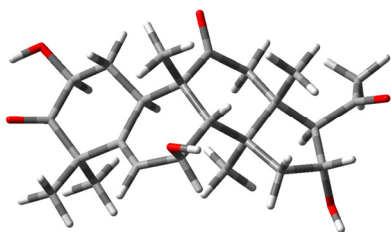

**5-5** (20.10%)

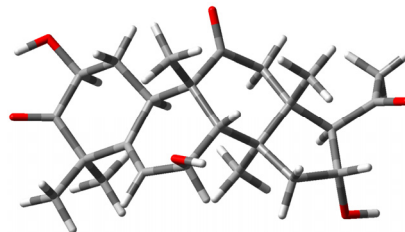

**5-6** (16.75%)

**Figure S43.** The lowest energy conformers of **5** (the relative populations are in parentheses).

**Table S8.** Extracted heats and weighting factors of the optimized conformers of **2–5** at B3LYP/6-311g(d,p) level

|          |           | B3LYP/6-31+G(d) |                                       |
|----------|-----------|-----------------|---------------------------------------|
|          | Conformer | Extracted heats | Boltzmann-calculated contribution (%) |
| <b>2</b> | 1         | -884.45037      | 24.27%                                |
|          | 2         | -884.45008      | 17.79%                                |
|          | 3         | -884.45022      | 20.72%                                |
|          | 4         | -884.45024      | 21.10%                                |
|          | 5         | -884.44904      | 5.92%                                 |

|   |   |            |        |
|---|---|------------|--------|
|   | 6 | -884.44955 | 10.19% |
| 3 | 1 | -809.20954 | 9.91%  |
|   | 2 | -809.21021 | 20.19% |
|   | 3 | -809.21021 | 20.02% |
|   | 4 | -809.21087 | 40.68% |
|   | 5 | -809.20947 | 9.20%  |

|   |   |             |        |
|---|---|-------------|--------|
| 4 | 1 | -810.41392  | 52.91% |
|   | 2 | -810.41381  | 47.08% |
| 5 | 1 | -1386.2244  | 24.79% |
|   | 2 | -1386.22422 | 20.55% |
|   | 3 | -1386.22333 | 7.96%  |
|   | 4 | -1386.22353 | 9.86%  |
|   | 5 | -1386.2242  | 20.10% |
|   | 6 | -1386.22403 | 16.75% |

**Table S9.** The Cartesian coordinates of the lowest energy conformers for **2–5**

| <b>2-1</b> | X axis(Å) | Y axis(Å) | Z axis(Å) | <b>2-2</b> | X axis(Å) | Y axis(Å) | Z axis(Å) |
|------------|-----------|-----------|-----------|------------|-----------|-----------|-----------|
| C          | -0.6046   | 0.6655    | -0.085    | C          | -0.6008   | 0.6746    | -0.0758   |
| C          | -2.0891   | 1.0909    | -0.0344   | C          | -2.0813   | 1.1109    | -0.0226   |
| C          | -2.8379   | -0.2009   | 0.2617    | C          | -2.8444   | -0.1753   | 0.2616    |
| C          | -2.1532   | -1.2266   | -0.6473   | C          | -2.1641   | -1.2056   | -0.6463   |
| C          | -0.6893   | -0.7296   | -0.7983   | C          | -0.6983   | -0.7126   | -0.8024   |
| C          | 0.4351    | -1.6823   | -0.3687   | C          | 0.4239    | -1.6764   | -0.3918   |
| C          | 1.6828    | -0.9264   | 0.1064    | C          | 1.6765    | -0.935    | 0.092     |
| C          | 2.222     | 4.00E-04  | -1.0121   | C          | 2.2215    | 0.0014    | -1.015    |
| C          | 1.5343    | 1.2873    | -1.3199   | C          | 1.5412    | 1.2951    | -1.3086   |
| C          | 0.3015    | 1.6263    | -0.8899   | C          | 0.3114    | 1.6369    | -0.8727   |
| C          | -0.2126   | 3.0138    | -1.1835   | C          | -0.1938   | 3.0314    | -1.1502   |
| O          | 3.2346    | -0.2987   | -1.6515   | O          | 3.2334    | -0.2963   | -1.6562   |
| O          | 2.6755    | -1.9085   | 0.4191    | O          | 2.6614    | -1.9297   | 0.3903    |
| C          | -0.0228   | 0.4861    | 1.3598    | C          | -0.0179   | 0.4748    | 1.3659    |
| C          | 1.3757    | -0.1063   | 1.3527    | C          | 1.3759    | -0.1299   | 1.3491    |
| C          | 2.2438    | 0.0651    | 2.3683    | C          | 2.2464    | 0.0221    | 2.3658    |
| O          | -0.0489   | 1.7288    | 2.0589    | O          | -0.0276   | 1.7071    | 2.0822    |
| C          | -2.3703   | -2.6541   | -0.1625   | C          | -2.3811   | -2.6314   | -0.1556   |
| O          | -4.211    | -0.0818   | -0.0635   | O          | -4.2119   | -0.0137   | -0.0703   |
| H          | -0.5558   | -0.5683   | -1.8798   | H          | -0.5718   | -0.5397   | -1.883    |
| H          | -2.2997   | 1.8553    | 0.7211    | H          | -2.2856   | 1.8711    | 0.739     |
| H          | -2.4386   | 1.4912    | -0.9944   | H          | -2.4257   | 1.523     | -0.9795   |
| H          | -2.758    | -0.48     | 1.3176    | H          | -2.7758   | -0.4463   | 1.3205    |
| H          | -2.6215   | -1.17     | -1.6413   | H          | -2.6348   | -1.1514   | -1.6392   |
| H          | 0.6861    | -2.3505   | -1.2031   | H          | 0.6692    | -2.3321   | -1.2378   |

|            |           |           |           |            |           |           |           |
|------------|-----------|-----------|-----------|------------|-----------|-----------|-----------|
| H          | 0.1146    | -2.3455   | 0.4433    | H          | 0.104     | -2.3517   | 0.4103    |
| H          | 2.1385    | 1.9686    | -1.9132   | H          | 2.1485    | 1.9794    | -1.8952   |
| H          | 0.5646    | 3.6583    | -1.6093   | H          | 0.5877    | 3.6757    | -1.5683   |
| H          | -1.0346   | 2.9797    | -1.9044   | H          | -1.0158   | 3.0113    | -1.8717   |
| H          | -0.5603   | 3.4975    | -0.2652   | H          | -0.5384   | 3.5068    | -0.2264   |
| H          | 3.2971    | -1.9119   | -0.3372   | H          | 3.2981    | -1.9081   | -0.3532   |
| H          | -0.6566   | -0.2026   | 1.93      | H          | -0.6568   | -0.2154   | 1.9288    |
| H          | 1.9795    | 0.6313    | 3.2569    | H          | 1.9867    | 0.5806    | 3.2606    |
| H          | 3.2334    | -0.3841   | 2.3497    | H          | 3.2328    | -0.4334   | 2.3409    |
| H          | 0.7251    | 2.2397    | 1.7642    | H          | 0.7268    | 2.2316    | 1.7629    |
| H          | -1.8508   | -3.3702   | -0.8071   | H          | -1.8619   | -3.3501   | -0.7975   |
| H          | -3.4365   | -2.9053   | -0.181    | H          | -3.4467   | -2.8847   | -0.1729   |
| H          | -2.0223   | -2.7918   | 0.8661    | H          | -2.0325   | -2.7643   | 0.8736    |
| H          | -4.591    | 0.6038    | 0.5131    | H          | -4.6682   | -0.8482   | 0.1333    |
| <b>2-3</b> | X axis(Å) | Y axis(Å) | Z axis(Å) | <b>2-4</b> | X axis(Å) | Y axis(Å) | Z axis(Å) |
| C          | -0.6039   | 0.6703    | -0.075    | C          | -0.7184   | 0.4027    | 0.3642    |
| C          | -2.0873   | 1.1011    | -0.0162   | C          | -2.1976   | 0.4868    | 0.861     |
| C          | -2.839    | -0.1899   | 0.2807    | C          | -3.03     | -0.3343   | -0.1218   |
| C          | -2.1628   | -1.2191   | -0.6311   | C          | -2.1021   | -1.4738   | -0.5557   |
| C          | -0.698    | -0.7264   | -0.786    | C          | -0.7575   | -0.7358   | -0.7156   |
| C          | 0.4239    | -1.6832   | -0.3603   | C          | 0.5219    | -1.5742   | -0.7536   |
| C          | 1.6788    | -0.9315   | 0.1015    | C          | 1.7439    | -0.7576   | -0.308    |
| C          | 2.2111    | -0.0096   | -1.0247   | C          | 1.9205    | 0.5086    | -1.1842   |
| C          | 1.5274    | 1.2804    | -1.3286   | C          | 1.0095    | 1.6792    | -1.0153   |
| C          | 0.2996    | 1.6258    | -0.8895   | C          | -0.1448   | 1.6771    | -0.3143   |
| C          | -0.2078   | 3.0176    | -1.1749   | C          | -0.9136   | 2.9679    | -0.1964   |
| O          | 3.2141    | -0.3164   | -1.6754   | O          | 2.8268    | 0.5778    | -2.0199   |
| O          | 2.6699    | -1.9176   | 0.4059    | O          | 2.889     | -1.6021   | -0.4637   |
| C          | -0.0094   | 0.4952    | 1.3658    | C          | 0.2028    | 0.0017    | 1.566     |
| C          | 1.385     | -0.1086   | 1.3486    | C          | 1.6215    | -0.3362   | 1.1486    |
| C          | 2.2602    | 0.056     | 2.3593    | C          | 2.6613    | -0.281    | 2.0032    |
| O          | -0.0144   | 1.7433    | 2.0553    | O          | 0.1952    | 1.0276    | 2.5581    |
| C          | -2.3837   | -2.6451   | -0.1441   | C          | -2.1243   | -2.6302   | 0.4399    |
| O          | -4.2216   | -0.0661   | -8.00E-04 | O          | -3.3536   | 0.4858    | -1.2402   |
| H          | -0.5677   | -0.567    | -1.8682   | H          | -0.8284   | -0.2581   | -1.7069   |
| H          | -2.2915   | 1.8639    | 0.7428    | H          | -2.2896   | 0.0292    | 1.854     |
| H          | -2.4379   | 1.5066    | -0.9734   | H          | -2.5825   | 1.5041    | 0.9562    |
| H          | -2.7414   | -0.4642   | 1.3361    | H          | -3.9657   | -0.6804   | 0.3282    |
| H          | -2.6325   | -1.1628   | -1.6242   | H          | -2.41     | -1.8661   | -1.5334   |
| H          | 0.665     | -2.3569   | -1.1933   | H          | 0.6721    | -1.9654   | -1.7686   |
| H          | 0.1056    | -2.3405   | 0.4574    | H          | 0.4464    | -2.4614   | -0.1146   |
| H          | 2.1312    | 1.9589    | -1.9255   | H          | 1.3682    | 2.5763    | -1.5133   |
| H          | 0.5704    | 3.6584    | -1.6045   | H          | -0.3806   | 3.8093    | -0.6534   |

|            |           |           |           |            |           |           |           |
|------------|-----------|-----------|-----------|------------|-----------|-----------|-----------|
| H          | -1.0353   | 2.9909    | -1.8899   | H          | -1.8813   | 2.8906    | -0.7008   |
| H          | -0.5458   | 3.5008    | -0.2528   | H          | -1.0705   | 3.2258    | 0.8558    |
| H          | 3.2923    | -1.9159   | -0.3497   | H          | 3.3691    | -1.2588   | -1.2449   |
| H          | -0.6438   | -0.1836   | 1.9471    | H          | -0.2054   | -0.8933   | 2.0488    |
| H          | 2.0045    | 0.6241    | 3.2493    | H          | 2.5286    | 9.00E-04  | 3.0439    |
| H          | 3.2461    | -0.4007   | 2.336     | H          | 3.6684    | -0.5421   | 1.6895    |
| H          | 0.7643    | 2.2428    | 1.7547    | H          | 0.7665    | 1.7438    | 2.2307    |
| H          | -1.8688   | -3.3639   | -0.7895   | H          | -1.5163   | -3.4669   | 0.0824    |
| H          | -3.4509   | -2.8922   | -0.159    | H          | -3.1462   | -3.007    | 0.5592    |
| H          | -2.0328   | -2.7832   | 0.8836    | H          | -1.7629   | -2.3437   | 1.4299    |
| H          | -4.3295   | 0.1945    | -0.9312   | H          | -3.9028   | -0.0455   | -1.8428   |
| <b>2-5</b> | X axis(Å) | Y axis(Å) | Z axis(Å) | <b>2-6</b> | X axis(Å) | Y axis(Å) | Z axis(Å) |
| C          | -0.6012   | 0.6612    | -0.1052   | C          | -0.7223   | 0.3935    | 0.3588    |
| C          | -2.0859   | 1.0892    | -0.0813   | C          | -2.2049   | 0.4681    | 0.8492    |
| C          | -2.8386   | -0.1914   | 0.2492    | C          | -3.0275   | -0.3575   | -0.1382   |
| C          | -2.1486   | -1.246    | -0.6215   | C          | -2.0892   | -1.4878   | -0.5732   |
| C          | -0.6838   | -0.7537   | -0.7791   | C          | -0.7493   | -0.7402   | -0.7257   |
| C          | 0.4363    | -1.6917   | -0.3108   | C          | 0.5353    | -1.5709   | -0.7625   |
| C          | 1.6841    | -0.9179   | 0.1349    | C          | 1.7497    | -0.7492   | -0.3071   |
| C          | 2.2175    | -0.0357   | -1.0224   | C          | 1.9223    | 0.5219    | -1.1769   |
| C          | 1.5374    | 1.2465    | -1.3615   | C          | 1.0044    | 1.687     | -1.0052   |
| C          | 0.3088    | 1.6001    | -0.931    | C          | -0.1527   | 1.6757    | -0.3086   |
| C          | -0.1876   | 2.9937    | -1.2242   | C          | -0.9226   | 2.9643    | -0.1809   |
| O          | 3.2173    | -0.37     | -1.6648   | O          | 2.8314    | 0.6015    | -2.0087   |
| O          | 2.6744    | -1.8915   | 0.4826    | O          | 2.9021    | -1.5841   | -0.4602   |
| C          | -0.0275   | 0.5148    | 1.3488    | C          | 0.195     | -0.0065   | 1.5634    |
| C          | 1.3861    | -0.0459   | 1.3515    | C          | 1.6173    | -0.336    | 1.1516    |
| C          | 2.2982    | 0.2003    | 2.3124    | C          | 2.6518    | -0.2834   | 2.013     |
| O          | -0.0967   | 1.7686    | 2.0208    | O          | 0.1748    | 1.0207    | 2.5549    |
| C          | -2.3686   | -2.657    | -0.0919   | C          | -2.1064   | -2.6491   | 0.4171    |
| O          | -4.21     | -0.0843   | -0.0865   | O          | -3.3544   | 0.4433    | -1.2694   |
| H          | -0.5432   | -0.625    | -1.864    | H          | -0.8194   | -0.2586   | -1.7151   |
| H          | -2.3032   | 1.8778    | 0.647     | H          | -2.2987   | 0.0082    | 1.8411    |
| H          | -2.4255   | 1.4589    | -1.0572   | H          | -2.5958   | 1.483     | 0.9447    |
| H          | -2.7655   | -0.4356   | 1.3143    | H          | -3.961    | -0.725    | 0.2996    |
| H          | -2.6105   | -1.2218   | -1.6198   | H          | -2.3921   | -1.8773   | -1.5536   |
| H          | 0.687     | -2.3929   | -1.1179   | H          | 0.6924    | -1.9557   | -1.7789   |
| H          | 0.1137    | -2.3213   | 0.5267    | H          | 0.4627    | -2.462    | -0.1285   |
| H          | 2.1468    | 1.9167    | -1.9611   | H          | 1.3624    | 2.5884    | -1.4957   |
| H          | 0.5944    | 3.6256    | -1.6598   | H          | -0.3894   | 3.8108    | -0.628    |
| H          | -1.0171   | 2.9695    | -1.937    | H          | -1.8886   | 2.8902    | -0.6894   |
| H          | -0.5198   | 3.4856    | -0.3046   | H          | -1.0839   | 3.2117    | 0.8731    |
| H          | 3.297     | -1.9172   | -0.2728   | H          | 3.3647    | -1.2559   | -1.2583   |



|            |           |           |           |            |           |           |           |
|------------|-----------|-----------|-----------|------------|-----------|-----------|-----------|
| H          | -0.6515   | -0.1842   | 1.9186    | H          | -0.2113   | -0.9037   | 2.0435    |
| H          | 2.0962    | 0.8247    | 3.1742    | H          | 2.5128    | -0.0105   | 3.0551    |
| H          | 3.2962    | -0.2288   | 2.2581    | H          | 3.6613    | -0.54     | 1.7029    |
| H          | 0.1194    | 1.6072    | 2.9539    | H          | 0.7872    | 1.7154    | 2.2567    |
| H          | -1.8449   | -3.3935   | -0.7095   | H          | -1.4913   | -3.4798   | 0.0579    |
| H          | -3.4346   | -2.909    | -0.1089   | H          | -3.1259   | -3.034    | 0.5311    |
| H          | -2.0269   | -2.7612   | 0.9429    | H          | -1.7506   | -2.3643   | 1.4097    |
| H          | -4.5818   | 0.658     | 0.421     | H          | -3.9915   | 1.1175    | -0.9756   |
| <b>3-1</b> | X axis(Å) | Y axis(Å) | Z axis(Å) | <b>3-2</b> | X axis(Å) | Y axis(Å) | Z axis(Å) |
| C          | 3.2901    | -0.6478   | 0.3092    | C          | 3.2921    | -0.6632   | 0.3092    |
| C          | 2.8738    | 0.7804    | 0.4809    | C          | 2.8778    | 0.7661    | 0.4897    |
| C          | 1.6489    | 1.2461    | 0.1657    | C          | 1.6533    | 1.2325    | 0.1746    |
| C          | 0.55      | 0.3543    | -0.3885   | C          | 0.5552    | 0.3426    | -0.3854   |
| C          | 0.8146    | -1.16     | -0.0693   | C          | 0.8123    | -1.171    | -0.0559   |
| C          | 2.2718    | -1.4856   | -0.4742   | C          | 2.2674    | -1.507    | -0.4604   |
| C          | -0.9037   | 0.7155    | -0.0125   | C          | -0.8987   | 0.7135    | -0.0186   |
| C          | -1.914    | -0.1681   | -0.7788   | C          | -1.9108   | -0.172    | -0.78     |
| C          | -1.6297   | -1.6751   | -0.6583   | C          | -1.6347   | -1.6787   | -0.6415   |
| C          | -0.1589   | -2.0152   | -0.9138   | C          | -0.1657   | -2.0282   | -0.8937   |
| C          | -3.3494   | 0.176     | -0.4356   | C          | -3.346    | 0.1825    | -0.4468   |
| C          | -3.859    | -0.0273   | 0.9495    | C          | -3.8614   | -7.00E-04 | 0.939     |
| O          | -3.1822   | -0.4989   | 1.8546    | O          | -3.1873   | -0.4571   | 1.8538    |
| C          | -4.2173   | 0.6787    | -1.3296   | C          | -4.209    | 0.6759    | -1.3506   |
| O          | 4.5309    | -0.6424   | -0.3843   | O          | 4.5307    | -0.6742   | -0.389    |
| C          | 1.4832    | 2.7204    | 0.272     | C          | 1.4796    | 2.7041    | 0.3011    |
| O          | 0.5486    | 3.3379    | -0.2212   | O          | 0.5769    | 3.3283    | -0.2403   |
| C          | 0.6255    | -1.5084   | 1.4317    | C          | 0.6224    | -1.5081   | 1.4474    |
| H          | 3.4683    | -1.0852   | 1.2979    | H          | 3.4761    | -1.1037   | 1.2951    |
| H          | 3.6538    | 1.443     | 0.8493    | H          | 3.652     | 1.4237    | 0.8798    |
| H          | 0.6221    | 0.4792    | -1.4809   | H          | 0.6346    | 0.4622    | -1.4778   |
| H          | 2.4079    | -1.3163   | -1.552    | H          | 2.3971    | -1.3539   | -1.5413   |
| H          | 2.4912    | -2.5507   | -0.3224   | H          | 2.4843    | -2.5708   | -0.2959   |
| H          | -1.1263   | 1.7541    | -0.2752   | H          | -1.1148   | 1.751     | -0.2913   |
| H          | -1.0412   | 0.6477    | 1.0717    | H          | -1.0401   | 0.6558    | 1.0657    |
| H          | -1.7663   | 0.0732    | -1.843    | H          | -1.7574   | 0.0573    | -1.8461   |
| H          | -2.2481   | -2.2223   | -1.3818   | H          | -2.2558   | -2.2313   | -1.3585   |
| H          | -1.922    | -2.0578   | 0.3248    | H          | -1.9286   | -2.0478   | 0.3463    |
| H          | 0.0523    | -1.8661   | -1.9811   | H          | 0.0464    | -1.8889   | -1.9621   |
| H          | 0.0019    | -3.0824   | -0.7158   | H          | -0.0103   | -3.0945   | -0.6869   |
| H          | -4.9065   | 0.2724    | 1.1229    | H          | -4.9099   | 0.3005    | 1.1037    |
| H          | -5.2432   | 0.9292    | -1.0769   | H          | -5.235    | 0.9332    | -1.1047   |
| H          | -3.9169   | 0.863     | -2.3574   | H          | -3.9049   | 0.8447    | -2.38     |
| H          | 4.7976    | -1.5694   | -0.5056   | H          | 4.3783    | -0.2779   | -1.2639   |

|            |           |           |           |            |           |           |           |
|------------|-----------|-----------|-----------|------------|-----------|-----------|-----------|
| H          | 2.2885    | 3.255     | 0.8045    | H          | 2.2533    | 3.2289    | 0.8876    |
| H          | 0.903     | -2.5522   | 1.62      | H          | 0.8882    | -2.5539   | 1.6414    |
| H          | 1.2368    | -0.8834   | 2.0894    | H          | 1.2426    | -0.8869   | 2.1003    |
| H          | -0.4068   | -1.3888   | 1.7695    | H          | -0.4078   | -1.3744   | 1.7863    |
| <b>3-3</b> | X axis(Å) | Y axis(Å) | Z axis(Å) | <b>3-4</b> | X axis(Å) | Y axis(Å) | Z axis(Å) |
| C          | 3.3895    | -0.7525   | 0.0866    | C          | 3.3884    | -0.7647   | 0.0864    |
| C          | 3.0684    | 0.7099    | 0.0598    | C          | 3.0716    | 0.7002    | 0.0759    |
| C          | 1.8237    | 1.2059    | -0.0924   | C          | 1.8273    | 1.1977    | -0.0732   |
| C          | 0.6067    | 0.3076    | -0.2638   | C          | 0.6096    | 0.3017    | -0.2545   |
| C          | 0.8692    | -1.1242   | 0.3258    | C          | 0.8678    | -1.1343   | 0.3279    |
| C          | 2.1973    | -1.6465   | -0.2733   | C          | 2.1949    | -1.6583   | -0.272    |
| C          | -0.7535   | 0.8386    | 0.2409    | C          | -0.7494   | 0.8333    | 0.2539    |
| C          | -1.9148   | -0.1061   | -0.1575   | C          | -1.9124   | -0.1053   | -0.1528   |
| C          | -1.6629   | -1.5464   | 0.3183    | C          | -1.666    | -1.5492   | 0.3143    |
| C          | -0.2842   | -2.0609   | -0.1003   | C          | -0.288    | -2.0655   | -0.1046   |
| C          | -3.2897   | 0.3676    | 0.2835    | C          | -3.2867   | 0.3689    | 0.2885    |
| C          | -4.4604   | -0.1333   | -0.4968   | C          | -4.4555   | -0.1127   | -0.5066   |
| O          | -4.3516   | -0.914    | -1.4346   | O          | -4.344    | -0.8742   | -1.4598   |
| C          | -3.5664   | 1.2238    | 1.2809    | C          | -3.5639   | 1.2088    | 1.2995    |
| O          | 4.4454    | -0.967    | -0.8393   | O          | 4.4462    | -0.9903   | -0.8352   |
| C          | 1.745     | 2.6897    | -0.176    | C          | 1.7453    | 2.6824    | -0.1341   |
| O          | 0.7207    | 3.3124    | -0.4198   | O          | 0.737     | 3.3011    | -0.4447   |
| C          | 0.9762    | -1.1321   | 1.8745    | C          | 0.9733    | -1.1512   | 1.8766    |
| H          | 3.7685    | -1.0094   | 1.0822    | H          | 3.7666    | -1.0319   | 1.0793    |
| H          | 3.9317    | 1.3649    | 0.1566    | H          | 3.9338    | 1.3533    | 0.1963    |
| H          | 0.4993    | 0.2       | -1.3552   | H          | 0.5038    | 0.2014    | -1.3466   |
| H          | 2.111     | -1.7197   | -1.3669   | H          | 2.1035    | -1.7339   | -1.3649   |
| H          | 2.4024    | -2.6705   | 0.066     | H          | 2.4004    | -2.6822   | 0.0674    |
| H          | -0.9765   | 1.8119    | -0.2051   | H          | -0.9691   | 1.8114    | -0.1831   |
| H          | -0.7131   | 0.993     | 1.3247    | H          | -0.7094   | 0.9787    | 1.339     |
| H          | -1.9178   | -0.1185   | -1.2576   | H          | -1.9125   | -0.1105   | -1.253    |
| H          | -2.4204   | -2.2219   | -0.0981   | H          | -2.4252   | -2.2193   | -0.108    |
| H          | -1.7744   | -1.6107   | 1.4072    | H          | -1.7796   | -1.6201   | 1.4026    |
| H          | -0.276    | -2.1804   | -1.192    | H          | -0.2787   | -2.1793   | -1.1969   |
| H          | -0.1335   | -3.0638   | 0.3187    | H          | -0.1409   | -3.071    | 0.3093    |
| H          | -5.448    | 0.2409    | -0.178    | H          | -5.4435   | 0.258     | -0.1849   |
| H          | -4.5799   | 1.5297    | 1.5242    | H          | -4.5771   | 1.5158    | 1.543     |
| H          | -2.7853   | 1.6584    | 1.8961    | H          | -2.7838   | 1.6269    | 1.9273    |
| H          | 4.6275    | -1.9219   | -0.8567   | H          | 4.1163    | -0.7679   | -1.7228   |
| H          | 2.6947    | 3.2277    | -0.0132   | H          | 2.679     | 3.2223    | 0.1001    |
| H          | 1.2274    | -2.1365   | 2.2352    | H          | 1.2209    | -2.1585   | 2.2319    |
| H          | 1.7453    | -0.4505   | 2.2491    | H          | 1.7445    | -0.4744   | 2.2555    |
| H          | 0.0436    | -0.8411   | 2.3649    | H          | 0.0412    | -0.8602   | 2.3679    |

|            |           |           |           |            |           |           |           |
|------------|-----------|-----------|-----------|------------|-----------|-----------|-----------|
| <b>3-5</b> | X axis(Å) | Y axis(Å) | Z axis(Å) |            |           |           |           |
| C          | 3.2906    | -0.6594   | 0.2986    |            |           |           |           |
| C          | 2.8782    | 0.7728    | 0.4715    |            |           |           |           |
| C          | 1.6518    | 1.2381    | 0.1582    |            |           |           |           |
| C          | 0.5506    | 0.3463    | -0.3939   |            |           |           |           |
| C          | 0.8115    | -1.1662   | -0.066    |            |           |           |           |
| C          | 2.2655    | -1.4967   | -0.4755   |            |           |           |           |
| C          | -0.9024   | 0.7135    | -0.0204   |            |           |           |           |
| C          | -1.9158   | -0.1739   | -0.778    |            |           |           |           |
| C          | -1.6356   | -1.6801   | -0.6434   |            |           |           |           |
| C          | -0.1667   | -2.0254   | -0.9012   |            |           |           |           |
| C          | -3.3503   | 0.1764    | -0.4373   |            |           |           |           |
| C          | -3.8587   | -0.0091   | 0.9507    |            |           |           |           |
| O          | -3.18     | -0.4644   | 1.8627    |            |           |           |           |
| C          | -4.2188   | 0.6682    | -1.3368   |            |           |           |           |
| O          | 4.5173    | -0.6875   | -0.4195   |            |           |           |           |
| C          | 1.4811    | 2.712     | 0.2706    |            |           |           |           |
| O          | 0.5511    | 3.3316    | -0.228    |            |           |           |           |
| C          | 0.627     | -1.5045   | 1.4378    |            |           |           |           |
| H          | 3.4713    | -1.1064   | 1.2827    |            |           |           |           |
| H          | 3.6491    | 1.4415    | 0.8457    |            |           |           |           |
| H          | 0.6237    | 0.4658    | -1.4868   |            |           |           |           |
| H          | 2.396     | -1.3333   | -1.555    |            |           |           |           |
| H          | 2.4832    | -2.5618   | -0.3205   |            |           |           |           |
| H          | -1.1231   | 1.7501    | -0.2922   |            |           |           |           |
| H          | -1.0389   | 0.6553    | 1.0645    |            |           |           |           |
| H          | -1.7681   | 0.0573    | -1.8445   |            |           |           |           |
| H          | -2.2578   | -2.2329   | -1.3593   |            |           |           |           |
| H          | -1.9255   | -2.0518   | 0.3447    |            |           |           |           |
| H          | 0.0414    | -1.8846   | -1.9702   |            |           |           |           |
| H          | -0.0077   | -3.0915   | -0.6959   |            |           |           |           |
| H          | -4.9072   | 0.2895    | 1.1201    |            |           |           |           |
| H          | -5.2443   | 0.9227    | -1.0863   |            |           |           |           |
| H          | -3.9194   | 0.8383    | -2.3674   |            |           |           |           |
| H          | 5.2074    | -0.3331   | 0.1653    |            |           |           |           |
| H          | 2.2805    | 3.2453    | 0.8129    |            |           |           |           |
| H          | 0.8997    | -2.5487   | 1.6311    |            |           |           |           |
| H          | 1.2446    | -0.8793   | 2.0893    |            |           |           |           |
| H          | -0.4032   | -1.377    | 1.7792    |            |           |           |           |
| <b>4-1</b> | X axis(Å) | Y axis(Å) | Z axis(Å) | <b>4-2</b> | X axis(Å) | Y axis(Å) | Z axis(Å) |
| C          | 3.1226    | -1.3207   | -0.2147   | C          | 3.1395    | -1.3057   | -0.1813   |
| C          | 3.3033    | 0.1658    | -0.0502   | C          | 3.3075    | 0.1867    | -0.0738   |
| C          | 2.093     | 1.0539    | 0.0455    | C          | 2.0904    | 1.0602    | 0.0666    |

|            |           |           |           |            |           |           |           |
|------------|-----------|-----------|-----------|------------|-----------|-----------|-----------|
| C          | 0.8465    | 0.5217    | 0.1153    | C          | 0.8532    | 0.5118    | 0.1595    |
| C          | 0.5995    | -1.0037   | 0.1635    | C          | 0.6116    | -1.0154   | 0.1686    |
| C          | 1.7216    | -1.6825   | -0.6735   | C          | 1.7485    | -1.6845   | -0.6532   |
| C          | -0.3954   | 1.4085    | 0.0792    | C          | -0.4062   | 1.3662    | 0.2086    |
| C          | -1.5841   | 0.8896    | -0.7782   | C          | -1.5621   | 0.9032    | -0.7212   |
| C          | -1.1789   | -0.3692   | -1.5495   | C          | -1.1532   | -0.325    | -1.5397   |
| C          | -0.7653   | -1.4095   | -0.511    | C          | -0.7404   | -1.4046   | -0.5437   |
| O          | -1.8556   | -1.689    | 0.3856    | O          | -1.828    | -1.7401   | 0.3288    |
| C          | -2.8289   | 0.5571    | 0.0799    | C          | -2.84     | 0.5379    | 0.0687    |
| C          | -2.4822   | -0.5833   | 1.0477    | C          | -2.5499   | -0.68     | 0.9669    |
| C          | -3.3934   | 1.7682    | 0.8242    | C          | -3.4073   | 1.7011    | 0.8887    |
| O          | -3.8844   | 0.1199    | -0.7957   | O          | -3.873    | 0.1757    | -0.8652   |
| C          | 0.6887    | -1.5151   | 1.6174    | C          | 0.6627    | -1.5436   | 1.6175    |
| C          | 2.4313    | 2.5218    | 0.0779    | C          | 2.4159    | 2.5303    | 0.1185    |
| O          | 4.435     | 0.6464    | 0.0166    | O          | 4.4336    | 0.6846    | -0.0791   |
| H          | 3.3719    | -1.8069   | 0.7335    | H          | 3.3751    | -1.7536   | 0.7888    |
| H          | 3.8409    | -1.6704   | -0.9652   | H          | 3.8715    | -1.6801   | -0.9063   |
| H          | 1.6143    | -2.7746   | -0.6396   | H          | 1.6508    | -2.7774   | -0.6169   |
| H          | 1.6195    | -1.3971   | -1.73     | H          | 1.6542    | -1.4022   | -1.7114   |
| H          | -0.1486   | 2.3897    | -0.3412   | H          | -0.1945   | 2.4002    | -0.0811   |
| H          | -0.6884   | 1.6007    | 1.1157    | H          | -0.7164   | 1.4191    | 1.2567    |
| H          | -1.863    | 1.6573    | -1.5124   | H          | -1.802    | 1.71      | -1.4267   |
| H          | -2.0134   | -0.7442   | -2.1521   | H          | -1.9878   | -0.6786   | -2.1558   |
| H          | -0.3672   | -0.1541   | -2.2544   | H          | -0.3389   | -0.0822   | -2.2326   |
| H          | -0.6171   | -2.3595   | -1.0393   | H          | -0.5729   | -2.3275   | -1.1126   |
| H          | -1.8537   | -0.2349   | 1.8689    | H          | -2.0067   | -0.3806   | 1.8664    |
| H          | -3.3977   | -0.9809   | 1.5008    | H          | -3.4935   | -1.1206   | 1.3088    |
| H          | -4.343    | 1.5125    | 1.309     | H          | -4.3784   | 1.4293    | 1.3191    |
| H          | -3.6144   | 2.5825    | 0.1247    | H          | -3.586    | 2.5733    | 0.2496    |
| H          | -2.7185   | 2.1497    | 1.5948    | H          | -2.7519   | 2.0057    | 1.7089    |
| H          | -3.7876   | -0.8447   | -0.9085   | H          | -4.0251   | 0.9295    | -1.46     |
| H          | -0.0205   | -1.0202   | 2.2827    | H          | -0.0733   | -1.0604   | 2.2634    |
| H          | 0.4994    | -2.5935   | 1.6635    | H          | 0.4813    | -2.6239   | 1.6466    |
| H          | 1.6726    | -1.3353   | 2.0626    | H          | 1.632     | -1.3597   | 2.0924    |
| H          | 3.2746    | 2.7159    | 0.75      | H          | 3.2851    | 2.7181    | 0.7587    |
| H          | 2.7002    | 2.8694    | -0.9247   | H          | 2.6395    | 2.9026    | -0.8863   |
| H          | 1.6144    | 3.1437    | 0.4525    | H          | 1.6115    | 3.1364    | 0.5413    |
| <b>5-1</b> | X axis(Å) | Y axis(Å) | Z axis(Å) | <b>5-2</b> | X axis(Å) | Y axis(Å) | Z axis(Å) |
| C          | -3.8875   | 1.4428    | -0.7715   | C          | -3.8838   | 1.4433    | -0.7722   |
| C          | -4.4401   | 0.0222    | -0.7693   | C          | -4.4406   | 0.0245    | -0.7758   |
| C          | -3.42     | -1.1217   | -0.9149   | C          | -3.4233   | -1.1219   | -0.9233   |
| C          | -2.2254   | -0.8632   | 0.0361    | C          | -2.2285   | -0.8701   | 0.0293    |
| C          | -1.6386   | 0.5546    | 0.0381    | C          | -1.6407   | 0.5472    | 0.042     |

|   |         |         |         |   |         |         |         |
|---|---------|---------|---------|---|---------|---------|---------|
| C | -2.7885 | 1.564   | 0.2704  | C | -2.7894 | 1.5576  | 0.275   |
| C | -1.6832 | -1.8349 | 0.7952  | C | -1.6856 | -1.8482 | 0.7799  |
| C | -0.4434 | -1.7179 | 1.6181  | C | -0.4441 | -1.7393 | 1.6018  |
| C | 0.4498  | -0.5041 | 1.2847  | C | 0.4456  | -0.5195 | 1.2806  |
| C | -0.4038 | 0.8002  | 1.0023  | C | -0.4118 | 0.7843  | 1.0145  |
| C | 1.5467  | -0.7892 | 0.2097  | C | 1.5419  | -0.791  | 0.2009  |
| C | 2.4606  | 0.4794  | 0.0634  | C | 2.4578  | 0.4796  | 0.068   |
| C | 1.6281  | 1.5964  | -0.5519 | C | 1.6168  | 1.6013  | -0.5292 |
| C | 0.4366  | 1.9352  | 0.3374  | C | 0.4305  | 1.9279  | 0.3711  |
| C | 2.6021  | -1.8525 | 0.6063  | C | 2.5908  | -1.8614 | 0.5865  |
| C | 3.8576  | -1.4932 | -0.2245 | C | 3.8603  | -1.4824 | -0.212  |
| C | 3.6152  | -0.0782 | -0.808  | C | 3.6123  | -0.07   | -0.8075 |
| C | 3.0525  | 1.0218  | 1.406   | C | 3.0608  | 1.001   | 1.4138  |
| C | 0.9175  | -1.2872 | -1.1272 | C | 0.9158  | -1.2769 | -1.142  |
| O | 4.0051  | -2.417  | -1.3003 | O | 4.0549  | -2.4202 | -1.266  |
| C | 4.9003  | 0.7447  | -0.8214 | C | 4.8953  | 0.758   | -0.8487 |
| O | 5.7649  | 0.6339  | 0.0481  | O | 5.9305  | 0.3936  | -0.2909 |
| C | 5.0592  | 1.7397  | -1.9424 | C | 4.8567  | 2.0626  | -1.6027 |
| O | 0.0932  | 3.1186  | 0.4217  | O | 0.0974  | 3.1118  | 0.4836  |
| C | -0.8622 | 1.3487  | 2.3858  | C | -0.8782 | 1.3121  | 2.4032  |
| C | -4.1632 | -2.4518 | -0.6508 | C | -4.1708 | -2.4505 | -0.6641 |
| C | -2.9323 | -1.153  | -2.3759 | C | -2.9337 | -1.1497 | -2.3837 |
| O | -5.6615 | -0.1584 | -0.7352 | O | -5.6627 | -0.1521 | -0.7448 |
| O | -4.9117 | 2.385   | -0.4662 | O | -4.9059 | 2.3886  | -0.4696 |
| O | -0.8346 | -1.6519 | 2.985   | O | -0.8362 | -1.6873 | 2.9691  |
| H | -1.2844 | 0.7427  | -0.983  | H | -1.2813 | 0.7411  | -0.9761 |
| H | 1.0055  | -0.3215 | 2.2145  | H | 1.0026  | -0.3441 | 2.2111  |
| H | 3.3065  | -0.1609 | -1.8578 | H | 3.3036  | -0.1624 | -1.8565 |
| H | -3.5171 | 1.6746  | -1.7746 | H | -3.508  | 1.6764  | -1.7731 |
| H | -3.2361 | 1.4185  | 1.2628  | H | -3.2417 | 1.4079  | 1.2646  |
| H | -2.4146 | 2.5939  | 0.2527  | H | -2.4129 | 2.5868  | 0.2643  |
| H | -2.1051 | -2.8365 | 0.7966  | H | -2.1074 | -2.8498 | 0.7733  |
| H | 0.1358  | -2.641  | 1.5131  | H | 0.1367  | -2.6602 | 1.4868  |
| H | 2.2351  | 2.5035  | -0.6569 | H | 2.2147  | 2.5139  | -0.6274 |
| H | 1.2584  | 1.3518  | -1.5517 | H | 1.2424  | 1.3679  | -1.5299 |
| H | 2.2606  | -2.8763 | 0.4177  | H | 2.2554  | -2.8817 | 0.3696  |
| H | 2.8346  | -1.7799 | 1.675   | H | 2.8056  | -1.8145 | 1.6607  |
| H | 4.7561  | -1.5651 | 0.3966  | H | 4.7276  | -1.5458 | 0.4535  |
| H | 3.6746  | 0.285   | 1.9228  | H | 2.3008  | 1.3298  | 2.1272  |
| H | 3.6778  | 1.904   | 1.2239  | H | 3.6762  | 0.2521  | 1.921   |
| H | 2.2878  | 1.3498  | 2.1145  | H | 3.6991  | 1.875   | 1.2403  |
| H | 0.2301  | -0.571  | -1.5726 | H | 0.2385  | -0.5527 | -1.5898 |
| H | 1.659   | -1.5039 | -1.9003 | H | 1.6621  | -1.5002 | -1.9092 |

|            |           |           |           |            |           |           |           |
|------------|-----------|-----------|-----------|------------|-----------|-----------|-----------|
| H          | 0.3751    | -2.2269   | -0.981    | H          | 0.3631    | -2.2117   | -1.0036   |
| H          | 4.2929    | -3.2636   | -0.9141   | H          | 4.9907    | -2.3513   | -1.5321   |
| H          | 5.017     | 1.2203    | -2.9029   | H          | 4.4972    | 2.8585    | -0.948    |
| H          | 4.2724    | 2.4941    | -1.886    | H          | 5.8641    | 2.3093    | -1.9501   |
| H          | 6.03      | 2.2362    | -1.8573   | H          | 4.2096    | 1.9736    | -2.4788   |
| H          | -0.0141   | 1.4439    | 3.0738    | H          | -0.0336   | 1.3989    | 3.0967    |
| H          | -1.3004   | 2.3505    | 2.3202    | H          | -1.3179   | 2.314     | 2.3495    |
| H          | -1.6073   | 0.7012    | 2.8564    | H          | -1.6251   | 0.6573    | 2.8608    |
| H          | -3.5237   | -3.3218   | -0.8382   | H          | -3.5343   | -3.322    | -0.8551   |
| H          | -5.0354   | -2.5591   | -1.3075   | H          | -5.0435   | -2.5525   | -1.3209   |
| H          | -4.5308   | -2.5058   | 0.3808    | H          | -4.5381   | -2.5072   | 0.3674    |
| H          | -3.7716   | -1.3      | -3.0663   | H          | -3.7727   | -1.2896   | -3.0759   |
| H          | -2.4404   | -0.2225   | -2.677    | H          | -2.4366   | -0.2204   | -2.6799   |
| H          | -2.2185   | -1.9693   | -2.5371   | H          | -2.2237   | -1.9688   | -2.5472   |
| H          | -5.7622   | 1.936     | -0.6512   | H          | -5.7574   | 1.9394    | -0.6498   |
| H          | -1.5368   | -2.3072   | 3.1342    | H          | -1.4957   | -2.3848   | 3.1218    |
| <b>5-3</b> | X axis(Å) | Y axis(Å) | Z axis(Å) | <b>5-4</b> | X axis(Å) | Y axis(Å) | Z axis(Å) |
| C          | -3.8827   | 1.3798    | -0.8906   | C          | -3.8836   | 1.383     | -0.8893   |
| C          | -4.4279   | -0.0425   | -0.8355   | C          | -4.4335   | -0.0372   | -0.8302   |
| C          | -3.399    | -1.1856   | -0.9069   | C          | -3.4086   | -1.1837   | -0.9033   |
| C          | -2.2254   | -0.8781   | 0.0556    | C          | -2.2308   | -0.8789   | 0.0555    |
| C          | -1.647    | 0.5426    | 0.0074    | C          | -1.6476   | 0.5397    | 0.005     |
| C          | -2.8076   | 1.554     | 0.1683    | C          | -2.8049   | 1.5546    | 0.1666    |
| C          | -1.6904   | -1.8135   | 0.864     | C          | -1.6936   | -1.8181   | 0.8577    |
| C          | -0.4606   | -1.6557   | 1.6962    | C          | -0.4576   | -1.6681   | 1.6818    |
| C          | 0.4247    | -0.4441   | 1.3322    | C          | 0.4245    | -0.4508   | 1.3274    |
| C          | -0.4398   | 0.8377    | 0.9912    | C          | -0.4392   | 0.8316    | 0.9889    |
| C          | 1.541     | -0.7541   | 0.2839    | C          | 1.543     | -0.7553   | 0.2785    |
| C          | 2.4391    | 0.5233    | 0.0922    | C          | 2.4409    | 0.523     | 0.0933    |
| C          | 1.5968    | 1.6102    | -0.5641   | C          | 1.5996    | 1.6118    | -0.5609   |
| C          | 0.4002    | 1.9646    | 0.3119    | C          | 0.4005    | 1.9612    | 0.3132    |
| C          | 2.608     | -1.7818   | 0.7396    | C          | 2.6098    | -1.7849   | 0.7309    |
| C          | 3.8867    | -1.4049   | -0.05     | C          | 3.8896    | -1.4042   | -0.0549   |
| C          | 3.5962    | -0.0612   | -0.7614   | C          | 3.5998    | -0.0576   | -0.7607   |
| C          | 3.0185    | 1.1061    | 1.4269    | C          | 3.0174    | 1.1007    | 1.4313    |
| C          | 0.939     | -1.3269   | -1.0361   | C          | 0.9422    | -1.3221   | -1.0449   |
| O          | 4.1798    | -2.4008   | -1.0212   | O          | 4.1847    | -2.3952   | -1.0305   |
| C          | 4.843     | 0.8008    | -0.9507   | C          | 4.8461    | 0.8063    | -0.9441   |
| O          | 4.8204    | 2.0232    | -0.805    | O          | 4.8211    | 2.0283    | -0.7952   |
| C          | 6.0974    | 0.1226    | -1.4446   | C          | 6.1029    | 0.1312    | -1.436    |
| O          | 0.0467    | 3.1462    | 0.3747    | O          | 0.044     | 3.1417    | 0.3794    |
| C          | -0.9398   | 1.4192    | 2.3467    | C          | -0.9373   | 1.4101    | 2.3465    |
| C          | -4.1409   | -2.5068   | -0.5982   | C          | -4.1536   | -2.5022   | -0.5909   |

|            |           |           |           |            |           |           |           |
|------------|-----------|-----------|-----------|------------|-----------|-----------|-----------|
| C          | -2.8804   | -1.2799   | -2.3545   | C          | -2.8943   | -1.281    | -2.3523   |
| O          | -5.6487   | -0.2297   | -0.8195   | O          | -5.6546   | -0.2201   | -0.8069   |
| O          | -4.9192   | 2.3273    | -0.6489   | O          | -4.9157   | 2.3338    | -0.6424   |
| O          | -0.8604   | -1.554    | 3.0585    | O          | -0.8342   | -1.6074   | 3.0537    |
| H          | -1.2683   | 0.6871    | -1.0119   | H          | -1.2692   | 0.6825    | -1.0146   |
| H          | 0.9633    | -0.2225   | 2.2633    | H          | 0.9614    | -0.2335   | 2.2603    |
| H          | 3.2563    | -0.2373   | -1.7902   | H          | 3.2617    | -0.2295   | -1.7909   |
| H          | -3.4923   | 1.569     | -1.895    | H          | -3.4964   | 1.5706    | -1.8953   |
| H          | -3.2769   | 1.4498    | 1.1559    | H          | -3.2723   | 1.453     | 1.1554    |
| H          | -2.4391   | 2.5845    | 0.1136    | H          | -2.4336   | 2.584     | 0.1102    |
| H          | -2.1057   | -2.8172   | 0.8996    | H          | -2.1095   | -2.8221   | 0.8992    |
| H          | 0.1289    | -2.5757   | 1.6244    | H          | 0.133     | -2.5846   | 1.5831    |
| H          | 2.1927    | 2.52      | -0.7037   | H          | 2.1949    | 2.5227    | -0.695    |
| H          | 1.2302    | 1.3246    | -1.5541   | H          | 1.2359    | 1.33      | -1.5531   |
| H          | 2.2993    | -2.818    | 0.5616    | H          | 2.3018    | -2.8202   | 0.5475    |
| H          | 2.7995    | -1.684    | 1.8146    | H          | 2.7996    | -1.6919   | 1.8066    |
| H          | 4.7419    | -1.3414   | 0.6317    | H          | 4.7436    | -1.3437   | 0.6284    |
| H          | 3.6741    | 0.404     | 1.9498    | H          | 2.2406    | 1.401     | 2.1388    |
| H          | 3.6042    | 2.0125    | 1.2454    | H          | 3.6721    | 0.3966    | 1.9526    |
| H          | 2.2431    | 1.4094    | 2.1349    | H          | 3.6034    | 2.0079    | 1.2545    |
| H          | 0.2805    | -0.6278   | -1.5482   | H          | 0.2845    | -0.6206   | -1.5546   |
| H          | 1.699     | -1.6165   | -1.7671   | H          | 1.7031    | -1.6087   | -1.7761   |
| H          | 0.3742    | -2.2451   | -0.8468   | H          | 0.3764    | -2.2407   | -0.8606   |
| H          | 4.3322    | -3.2399   | -0.5504   | H          | 4.3285    | -3.2384   | -0.5641   |
| H          | 6.5111    | -0.522    | -0.6665   | H          | 5.8833    | -0.4455   | -2.3378   |
| H          | 5.8742    | -0.4565   | -2.344    | H          | 6.85      | 0.8905    | -1.686    |
| H          | 6.8447    | 0.8801    | -1.6991   | H          | 6.5151    | -0.5151   | -0.6586   |
| H          | -0.1096   | 1.5477    | 3.0511    | H          | -0.1064   | 1.5365    | 3.0504    |
| H          | -1.3917   | 2.4114    | 2.2414    | H          | -1.3888   | 2.4028    | 2.2441    |
| H          | -1.6865   | 0.7743    | 2.8185    | H          | -1.6838   | 0.7655    | 2.8179    |
| H          | -3.4937   | -3.3807   | -0.7339   | H          | -3.5097   | -3.3784   | -0.7282   |
| H          | -4.9993   | -2.6485   | -1.2665   | H          | -5.0149   | -2.6416   | -1.2558   |
| H          | -4.5287   | -2.5167   | 0.4273    | H          | -4.5374   | -2.5101   | 0.4362    |
| H          | -3.7043   | -1.4617   | -3.0551   | H          | -3.7207   | -1.4604   | -3.0505   |
| H          | -2.3858   | -0.3614   | -2.6864   | H          | -2.3973   | -0.3644   | -2.6862   |
| H          | -2.1601   | -2.0991   | -2.4639   | H          | -2.1772   | -2.1027   | -2.4631   |
| H          | -5.7621   | 1.8682    | -0.8428   | H          | -5.7601   | 1.8842    | -0.8515   |
| H          | -1.6132   | -2.1511   | 3.2049    | H          | -1.7949   | -1.4678   | 3.1119    |
| <b>5-5</b> | X axis(Å) | Y axis(Å) | Z axis(Å) | <b>5-6</b> | X axis(Å) | Y axis(Å) | Z axis(Å) |
| C          | -3.8705   | 1.4553    | -0.7785   | C          | -3.865    | 1.4607    | -0.7745   |
| C          | -4.4422   | 0.0428    | -0.7701   | C          | -4.4435   | 0.051     | -0.7743   |
| C          | -3.4366   | -1.1156   | -0.9041   | C          | -3.4432   | -1.1113   | -0.9136   |
| C          | -2.2294   | -0.8647   | 0.0326    | C          | -2.2344   | -0.8715   | 0.0239    |

|   |         |         |         |   |         |         |         |
|---|---------|---------|---------|---|---------|---------|---------|
| C | -1.6345 | 0.5483  | 0.0387  | C | -1.6361 | 0.5398  | 0.044   |
| C | -2.7766 | 1.567   | 0.2686  | C | -2.7749 | 1.561   | 0.2775  |
| C | -1.6867 | -1.8424 | 0.7838  | C | -1.691  | -1.8585 | 0.7625  |
| C | -0.4399 | -1.7476 | 1.5942  | C | -0.4402 | -1.7766 | 1.5688  |
| C | 0.4498  | -0.5256 | 1.2807  | C | 0.4465  | -0.5477 | 1.2733  |
| C | -0.4073 | 0.7807  | 1.0145  | C | -0.4143 | 0.7589  | 1.0283  |
| C | 1.5459  | -0.7947 | 0.199   | C | 1.5424  | -0.799  | 0.1869  |
| C | 2.4553  | 0.4785  | 0.0636  | C | 2.4524  | 0.4773  | 0.0671  |
| C | 1.6162  | 1.6008  | -0.5341 | C | 1.6036  | 1.6046  | -0.509  |
| C | 0.4373  | 1.9277  | 0.3763  | C | 0.4321  | 1.916   | 0.4156  |
| C | 2.6069  | -1.8584 | 0.5803  | C | 2.5984  | -1.8685 | 0.5557  |
| C | 3.8576  | -1.4859 | -0.2529 | C | 3.8623  | -1.4745 | -0.2458 |
| C | 3.6078  | -0.0649 | -0.8191 | C | 3.6052  | -0.0549 | -0.8211 |
| C | 3.0509  | 1.0057  | 1.4111  | C | 3.0601  | 0.9816  | 1.4179  |
| C | 0.9156  | -1.2819 | -1.1418 | C | 0.9155  | -1.272  | -1.1608 |
| O | 4.003   | -2.3963 | -1.3397 | O | 4.0529  | -2.3986 | -1.3119 |
| C | 4.8903  | 0.7618  | -0.826  | C | 4.8831  | 0.7811  | -0.8516 |
| O | 5.7504  | 0.6517  | 0.0481  | O | 5.9113  | 0.4294  | -0.2729 |
| C | 5.0513  | 1.7587  | -1.9449 | C | 4.8446  | 2.0816  | -1.6126 |
| O | 0.1146  | 3.112   | 0.5082  | O | 0.1214  | 3.0991  | 0.5817  |
| C | -0.8764 | 1.3004  | 2.4054  | C | -0.8909 | 1.2525  | 2.4262  |
| C | -4.1962 | -2.4322 | -0.6211 | C | -4.209  | -2.4257 | -0.6375 |
| C | -2.9568 | -1.1682 | -2.3673 | C | -2.963  | -1.1581 | -2.3769 |
| O | -5.6667 | -0.1186 | -0.7469 | O | -5.6688 | -0.1041 | -0.7528 |
| O | -4.8828 | 2.4149  | -0.4873 | O | -4.873  | 2.4246  | -0.4831 |
| O | -0.8606 | -1.7317 | 2.9525  | O | -0.8537 | -1.7817 | 2.9296  |
| H | -1.2739 | 0.7373  | -0.9798 | H | -1.2701 | 0.7362  | -0.9711 |
| H | 1.0063  | -0.3529 | 2.2115  | H | 1.0039  | -0.3861 | 2.2057  |
| H | 3.2952  | -0.1358 | -1.8687 | H | 3.2933  | -0.1343 | -1.8701 |
| H | -3.4907 | 1.6748  | -1.7809 | H | -3.48   | 1.6828  | -1.7744 |
| H | -3.2306 | 1.4235  | 1.2583  | H | -3.2336 | 1.4119  | 1.2642  |
| H | -2.3934 | 2.5936  | 0.2547  | H | -2.3875 | 2.5862  | 0.2729  |
| H | -2.1274 | -2.8355 | 0.8086  | H | -2.1323 | -2.8516 | 0.7761  |
| H | 0.131   | -2.6724 | 1.4591  | H | 0.13    | -2.699  | 1.4154  |
| H | 2.2218  | 2.509   | -0.6376 | H | 2.1993  | 2.5189  | -0.6049 |
| H | 1.2343  | 1.3663  | -1.5316 | H | 1.2152  | 1.383   | -1.5068 |
| H | 2.2684  | -2.8815 | 0.3826  | H | 2.2667  | -2.888  | 0.3292  |
| H | 2.8437  | -1.7959 | 1.6487  | H | 2.8183  | -1.8324 | 1.6292  |
| H | 4.7593  | -1.562  | 0.3631  | H | 4.734   | -1.544  | 0.4133  |
| H | 3.6816  | 0.2663  | 1.9135  | H | 2.3025  | 1.2882  | 2.1438  |
| H | 3.6684  | 1.8953  | 1.2381  | H | 3.6882  | 0.2311  | 1.9069  |
| H | 2.2884  | 1.3171  | 2.1294  | H | 3.6869  | 1.8659  | 1.2545  |
| H | 0.2285  | -0.5626 | -1.5821 | H | 0.2371  | -0.5446 | -1.6012 |



|   |         |         |         |   |         |         |         |
|---|---------|---------|---------|---|---------|---------|---------|
| H | 1.6566  | -1.4926 | -1.9171 | H | 1.6612  | -1.4863 | -1.931  |
| H | 0.3731  | -2.2227 | -1.0032 | H | 0.364   | -2.2089 | -1.0319 |
| H | 4.2951  | -3.2476 | -0.9673 | H | 4.9848  | -2.3211 | -1.5888 |
| H | 5.0239  | 1.2391  | -2.9059 | H | 4.4724  | 2.878   | -0.9656 |
| H | 4.2564  | 2.5051  | -1.8963 | H | 5.8542  | 2.333   | -1.95   |
| H | 6.0161  | 2.2648  | -1.8494 | H | 4.2076  | 1.9843  | -2.4952 |
| H | -0.0325 | 1.3869  | 3.0998  | H | -0.0502 | 1.3277  | 3.1259  |
| H | -1.3195 | 2.3009  | 2.3563  | H | -1.3356 | 2.253   | 2.3929  |
| H | -1.6204 | 0.6399  | 2.8596  | H | -1.6363 | 0.583   | 2.8647  |
| H | -3.5705 | -3.3132 | -0.804  | H | -3.5885 | -3.3089 | -0.827  |
| H | -5.0745 | -2.5345 | -1.2703 | H | -5.089  | -2.5194 | -1.2858 |
| H | -4.5567 | -2.4701 | 0.4137  | H | -4.5679 | -2.468  | 0.3977  |
| H | -3.8019 | -1.3051 | -3.0527 | H | -3.8086 | -1.2848 | -3.0636 |
| H | -2.4487 | -0.2492 | -2.6771 | H | -2.4481 | -0.2408 | -2.6804 |
| H | -2.259  | -1.9988 | -2.5252 | H | -2.2708 | -1.9925 | -2.5398 |
| H | -5.7389 | 1.9667  | -0.6483 | H | -5.7311 | 1.9789  | -0.6407 |
| H | -0.0737 | -1.8471 | 3.5107  | H | -0.0694 | -1.9543 | 3.4768  |

#### Reference

(1) Frisch, M.J.; Trucks, G.W.; Schlegel, H.B.; Scuseria, G.E.; Robb, M.A.; Cheeseman, J.R.; Scalmani, G.; Barone, V.; Mennucci, B.; Petersson, G.A. *Gaussian 09*; Version 09; Gaussian, Inc.: Wallingford, CT, USA, 2009.
